# Supplementary material for: Large contribution of meteorological factors to inter-decadal changes in regional aerosol optical depth
Source: Copernicus journal article supplement (doi:10.5194/acp-19-10497-2019), 2019-08-21
Supplement: Supplementary file 1 [file acp-19-10497-2019-supplement.pdf]

Supplement of Atmos. Chem. Phys., 19, 10497–10523, 2019  
<https://doi.org/10.5194/acp-19-10497-2019-supplement>  
© Author(s) 2019. This work is distributed under  
the Creative Commons Attribution 4.0 License.

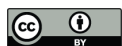

*Supplement of*

## **Large contribution of meteorological factors to inter-decadal changes in regional aerosol optical depth**

**Huizheng Che et al.**

*Correspondence to:* Huizheng Che (chehz@cma.gov.cn) and Xiaoye Zhang (xiaoye@cma.gov.cn)

The copyright of individual parts of the supplement might differ from the CC BY 4.0 License.

**This PDF file includes:**

Figs. S1 to S20

Tables. S1 to S5

## **Supplementary Figure captions:**

**Fig. S1.** Spatial distributions of annual trends in AOD calculated from the time series value of the de-seasonalized monthly anomaly from (a) MODIS/Terra and (b) MODIS/Aqua between 2003 and 2016. The grid areas with black dots indicate statistical significance at the 95% confidence level.

**Fig. S2.** Validations of AERONET AOD measurements against the three-hourly MERRA-2 AOD over the 12 ROIs, as defined in Figure 1. The color-coded dots indicate the number of samples. Where the solid red line is the line of best fit and the black dashed line is the 1:1 line.

**Fig. S3.** Validations of CARSNET AOD measurements against the three-hourly MERRA-2 AOD over (a) NC, (b) SC, and (c) NWC, as defined in Figure 1. The color-coded dots indicate the number of samples. Where the solid red line is the line of best fit and the black dashed line is the 1:1 line.

**Fig. S4.** Inter-annual variations in AOD from MERRA-2, MODIS/Terra and MISR over the 12 ROIs. The vertical bars represent the  $\pm 1$  standard deviation of annual mean AOD within the specified regions. The  $R$  between three regional annual mean AOD time series calculated by three different AOD products are given in the top panels.

**Fig. S5.** Spatial distributions of the  $R$  between (a) MERRA-2 and MODIS/Terra AOD, (b) MERRA-2 and MISR AOD, and (c) MODIS/Terra and MISR AOD during 2001–2016.

**Fig. S6.** Spatial distributions of annual and seasonal mean AODs during different periods for different AOD products. The first column represents spatial distribution of the annual and seasonal mean MERRA-2 AOD for 1980-2016, while the second and fourth columns represent the annual and seasonal spatial distribution of MERRA-2, MODIS and MISR AODs for 2001-2016, respectively.

**Fig. S7.** Inter-comparisons of global and regional seasonal trends in AOD calculated from the time series value of de-seasonalized monthly anomaly of MERRA-2, MODIS/Terra and MISR during the four periods of 1980–2016, 1980–1997, 1998–2016, and 2001–2016. Error bars represent the uncertainty associated with the calculated trend. The trend bars with shadow indicate statistical significance at the 95% confidence level.

**Fig. S8.** Sliding-window trend analyses of the Spring (March, April, and May) mean MERRA-2 AOD from 1998 to 2016 over the 12 ROIs (see Figure 1 for names and locations of regions), with at least 10 years used to calculate trends. The  $x$ -axis and  $y$ -axis indicate the start year and the length of the time series to calculate the trend, respectively. The colors of rectangles represent the intensity of the trend (units: /year), and those with black 'x' signs indicate linear trends above the 95% significance level.

**Fig. S9.** The same as Figure S8, but for the Summer (June, July, and August).

**Fig. S10.** The same as Figure S8, but for the Autumn (September, October, and November).

**Fig. S11.** The same as Figure S8, but for the Winter (December, January, and February).

**Fig. S12.** Time series of decadal trends in the annual and seasonal mean AOD for the 12 ROIs. The trends are calculated for each 10-year interval starting from 1998 to 2006 (*x*-axis).

**Fig. S13.** Spatial distributions of the *R* between MERRA-2 AOD and total anthropogenic emissions of total suspended particles (TSP), SO<sub>2</sub>, black carbon (BC), and organic carbon (OC) for the period of 1980-2014. Only the *R* with 95% confidence level was shown.

**Fig. S14.** Spatial distributions of linear trends (units: kg/km<sup>2</sup>/year) in total anthropogenic emissions of TSP, SO<sub>2</sub>, BC, and OC during 1980–1997 derived from the Peking University emissions inventory (<http://inventory.pku.edu.cn/>). Only linear trend values with statistical significance at the 95% confidence level are shown.

**Fig. S15.** Spatial distributions of the *R* between MERRA-2 AOD and total anthropogenic emissions of TSP, SO<sub>2</sub>, BC, and OC for 1980–1997. Only the *R* with 95% confidence level was shown.

**Fig. S16.** The same as Figure S14, but for 1998-2014.

**Fig. S17.** The same as Figure S15, but for 1998-2014.

**Fig. S18.** Pearson's *R* for spatially-averaged, MERRA-2 AOD versus meteorological variables during (a) 1980–1997 (top panel), (b) 1998-2014 (middle panel), and (c) 1980-2014 (bottom panel) over the 12 ROIs. Colored squares marked with 'x' signs indicate *R* above 95% significance level.

**Fig. S19.** Time series of MERRA-2 (in black) and modeled AOD monthly normalized anomalies from 1980 to 1997 over the 12 regions of interest. The coefficient of determination ( $R^2$ ) of the regression fit of the stepwise MLR model with emission factors (in blue), meteorology (in green), and both emissions and meteorology (in red) as predictors are given in the top-right of each panel.

**Fig. S20.** Time series of MERRA-2 (in black) and modeled AOD monthly normalized anomalies from 1998 to 2014 over the 12 regions of interest. The coefficient of determination ( $R^2$ ) of the regression fit of the stepwise MLR model with emission factors (in blue), meteorology (in green), and both emissions and meteorology (in red) as predictors are given in the top-right of each panel.

## **Supplementary Table captions:**

**Table S1.** Global and regional annual and seasonal trends (unit: /year) derived based upon MERRA-2, MODIS/Terra and MISR AOD datasets during the four historical periods, 1980-2016, 1980-1997, 1998-2016, and 2001-2016. Bold font indicates the trend is statistically significant at the 95% level.

**Table S2.** Stepwise multiple linear regression (MLR) models for monthly AOD over the 12 ROIs during three different periods: 1980-1997, 1998-2014, and 1980-2014. Note that after implementing variable filtering based on stepwise MLR model, the number of explanatory variables retained for each ROI is different.

**Table S3.** The LMG method for estimated relative importance (%) of the retained variables based on stepwise MLR model over the 12 ROIs during three different periods: 1980-1997, 1998-2014, and 1980-2014. Note that after implementing variable filtering based on stepwise MLR model, the number of explanatory variables retained for each ROI is different.

**Table S4.** Location information from the selected 468 AERONET sites worldwide and results for the statistical comparison with three-hourly MERRA-2 AOD. R is (Pearson) correlation coefficient, MAE is the mean absolute error, RMSE is the root-mean-square error of the differences, RMB is the relative mean bias, MFE is the mean fractional error, FGE is the fractional gross error and IOA is the index of agreement.

**Table S5.** Location information from the 37 CARSNET sites in China and results for the statistical comparison with three-hourly MERRA-2 AOD. R is (Pearson) correlation coefficient, MAE is the mean absolute error, RMSE is the root-mean-square error of the differences, RMB is the relative mean bias, MFE is the mean fractional error, FGE is the fractional gross error and IOA is the index of agreement.

## AOD trend (2003-2016)

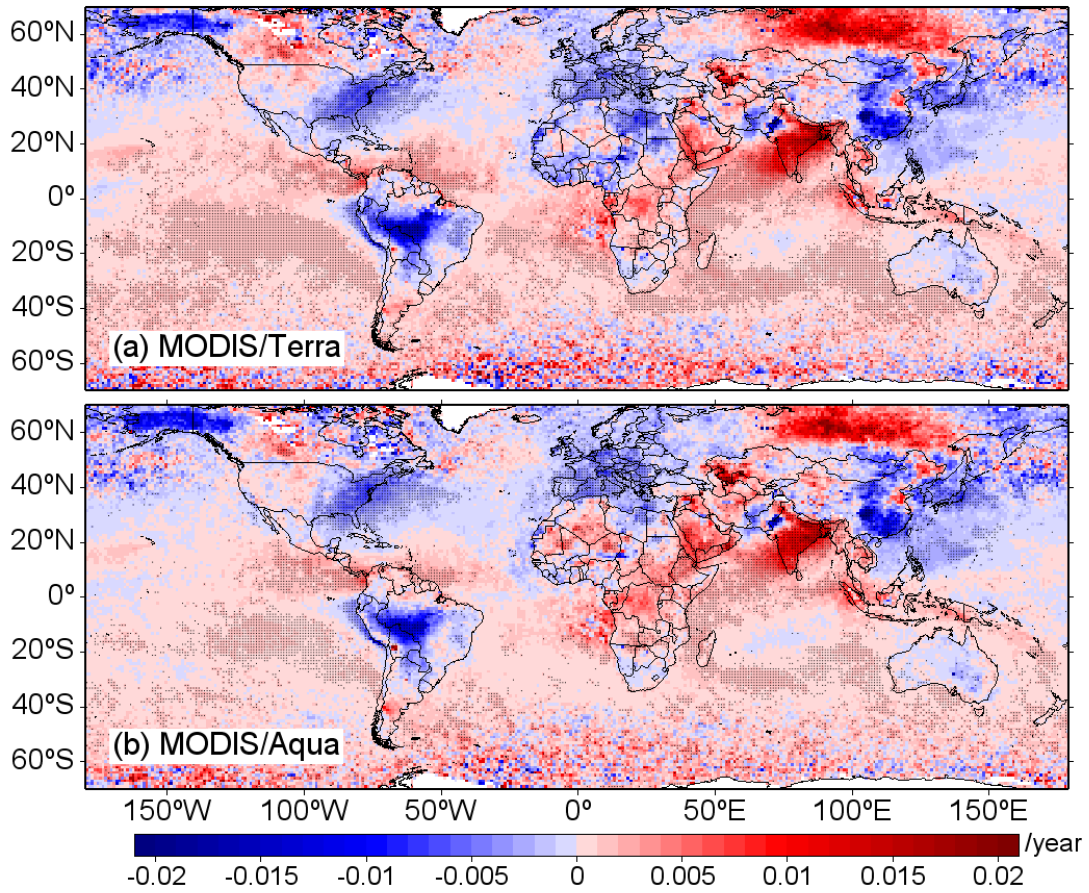

**Fig. S1.** Spatial distributions of annual trends in AOD calculated from the time series value of the de-seasonalized monthly anomaly from (a) MODIS/Terra and (b) MODIS/Aqua between 2003 and 2016. The grid areas with black dots indicate statistical significance at the 95% confidence level.

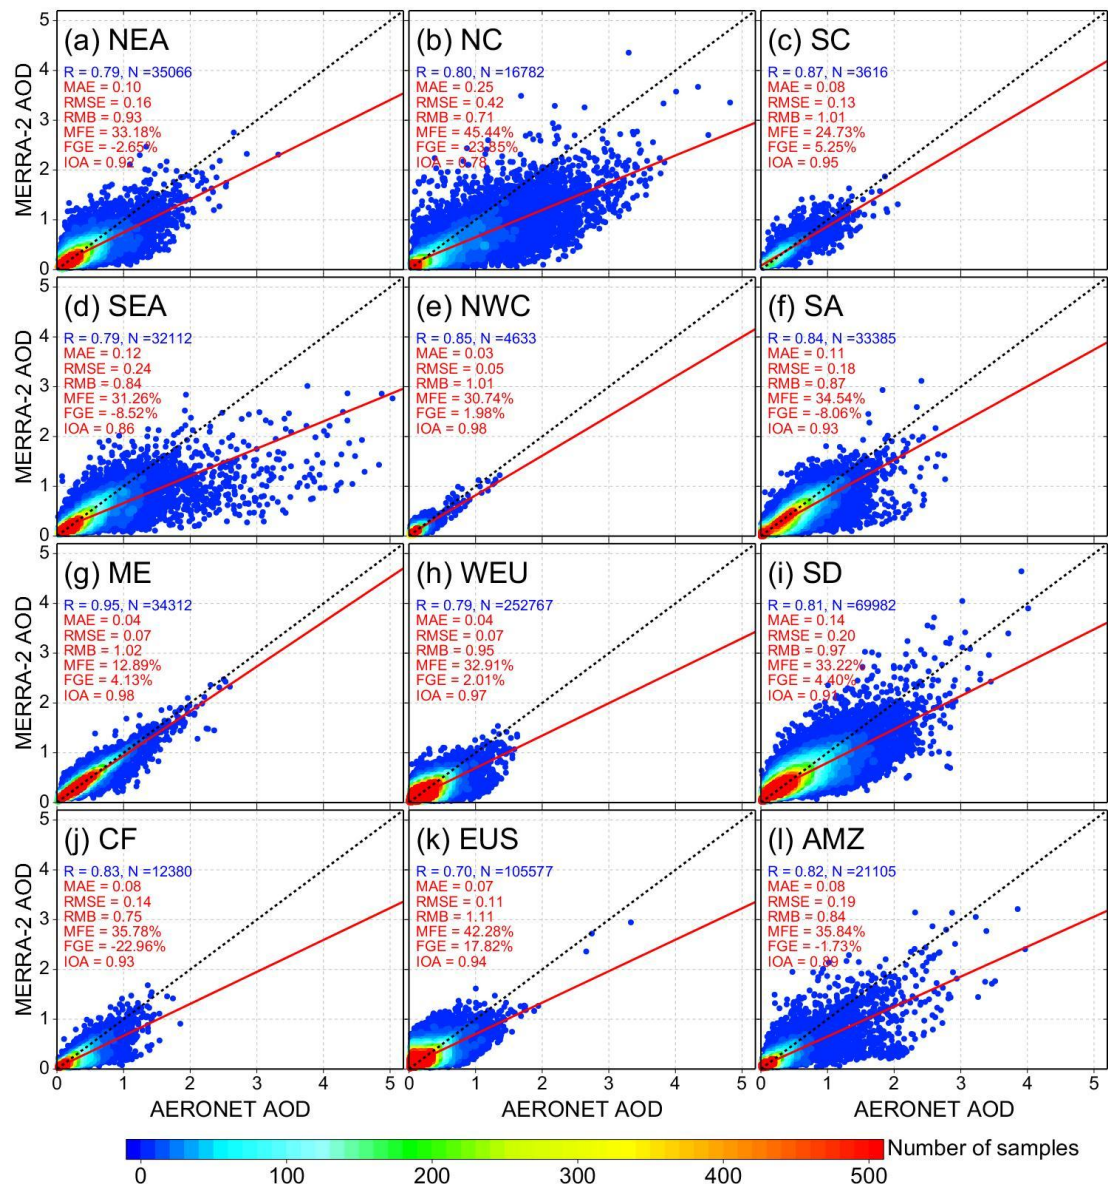

**Fig. S2.** Validations of AERONET AOD measurements against the three-hourly MERRA-2 AOD over the 12 ROIs, as defined in Figure 1. The color-coded dots indicate the number of samples. Where the solid red line is the line of best fit and the black dashed line is the 1:1 line.

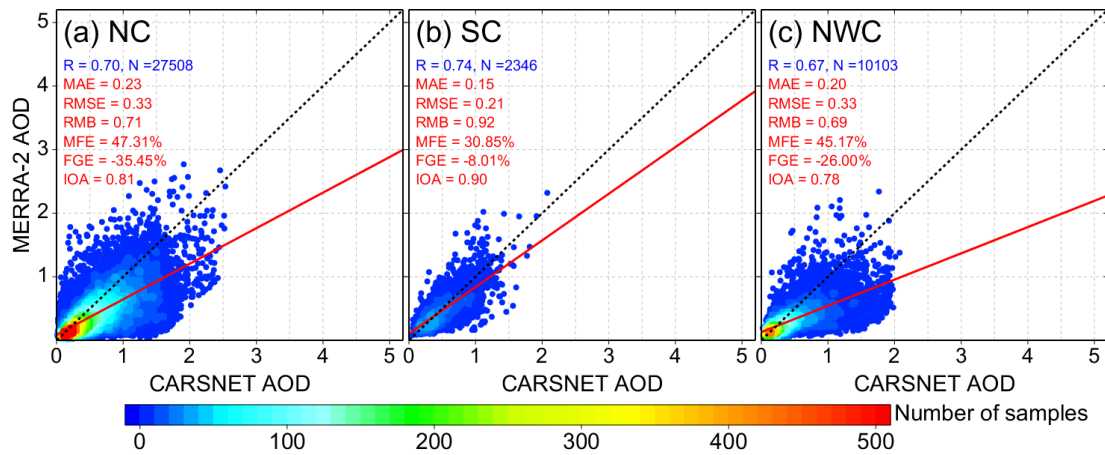

**Fig. S3.** Validations of CARSNET AOD measurements against the three-hourly MERRA-2 AOD over (a) NC, (b) SC, and (c) NWC, as defined in Figure 1. The color-coded dots indicate the number of samples. Where the solid red line is the line of best fit and the black dashed line is the 1:1 line.



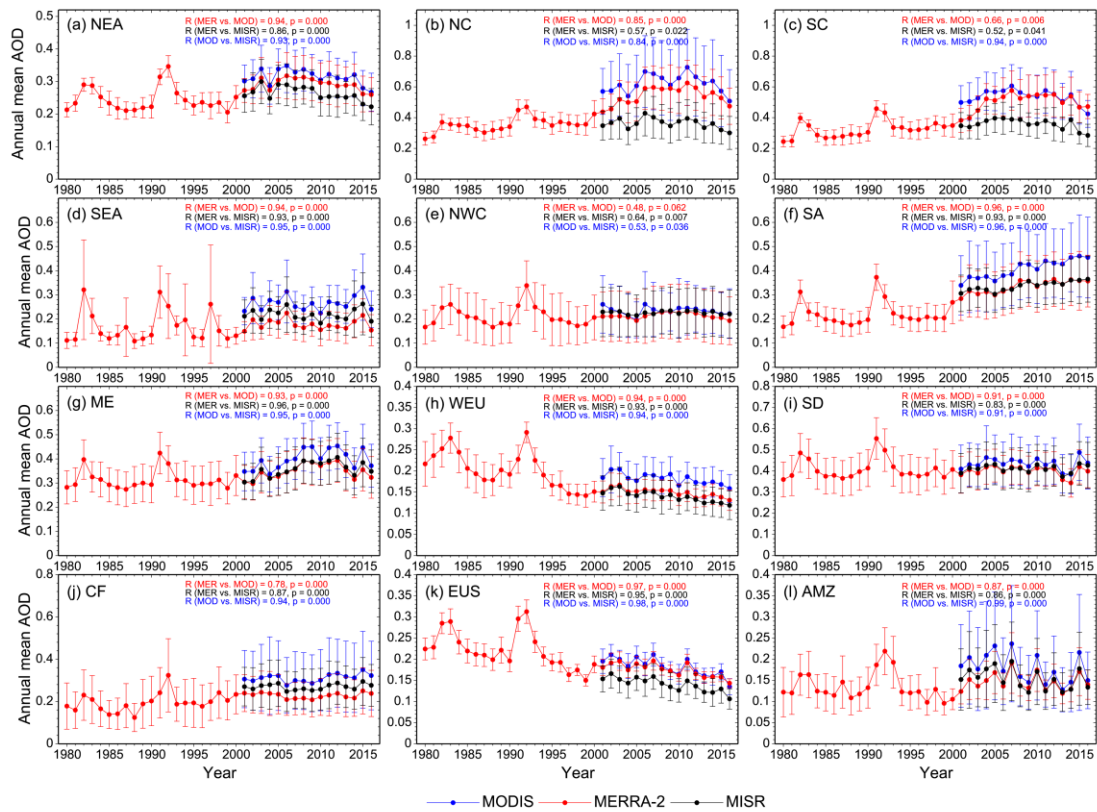

**Fig. S4.** Inter-annual variations in AOD from MERRA-2, MODIS/Terra and MISR over the 12 ROIs. The vertical bars represent the  $\pm 1$  standard deviation of annual mean AOD within the specified regions. The  $R$  between three regional annual mean AOD time series calculated by three different AOD products are given in the top panels.

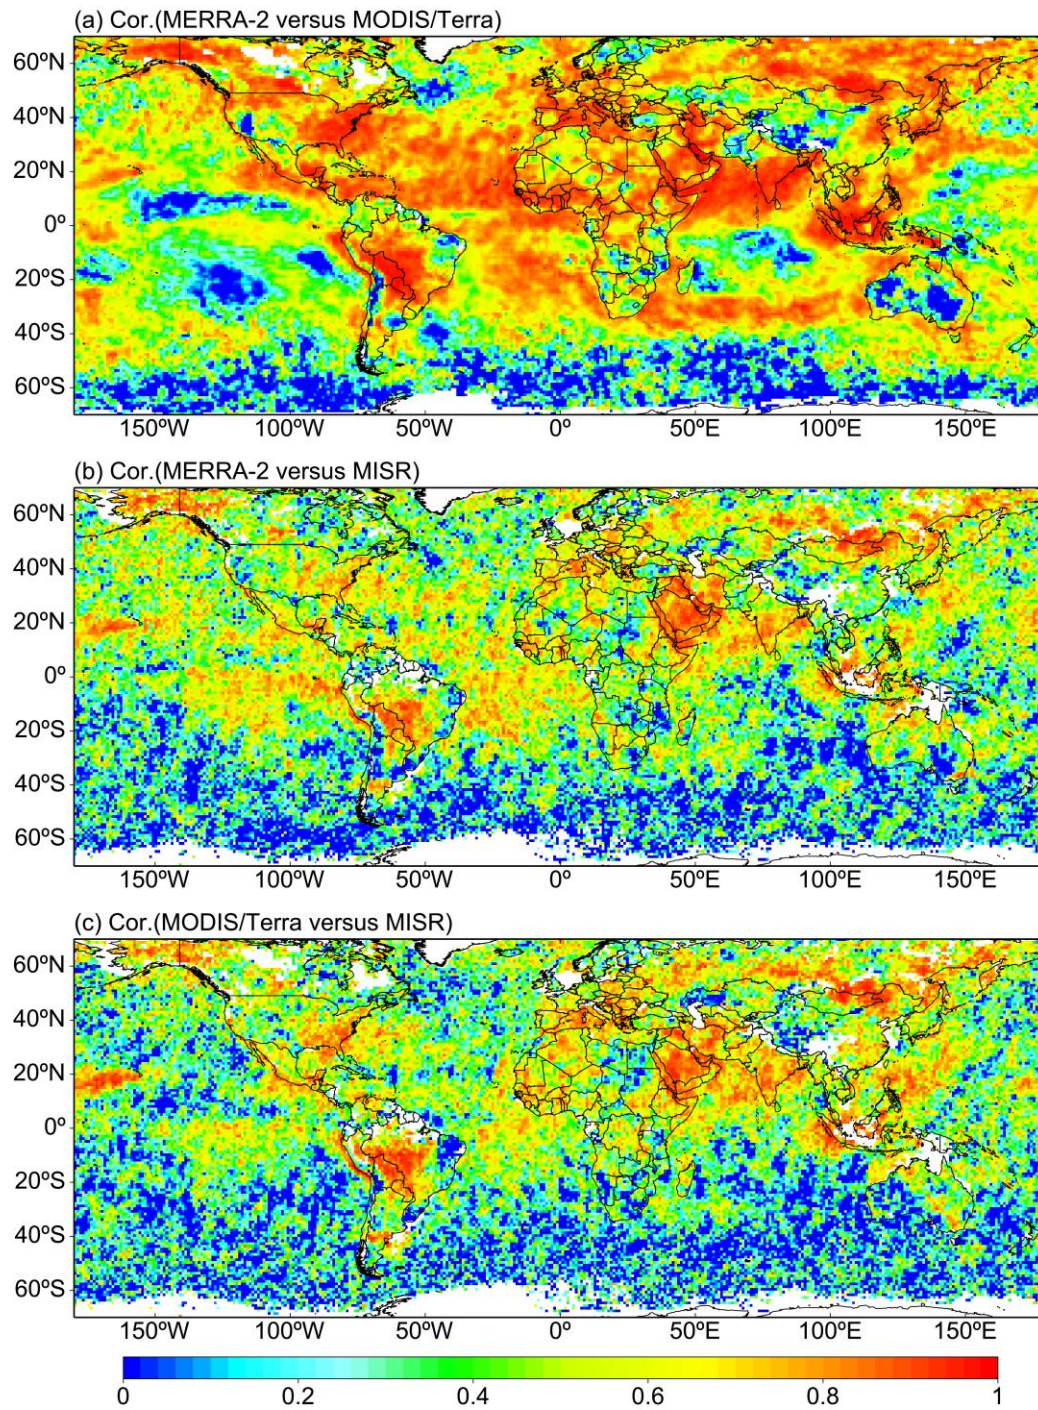

**Fig. S5.** Spatial distributions of the  $R$  between (a) MERRA-2 and MODIS/Terra AOD, (b) MERRA-2 and MISR AOD, and (c) MODIS/Terra and MISR AOD during 2001–2016.

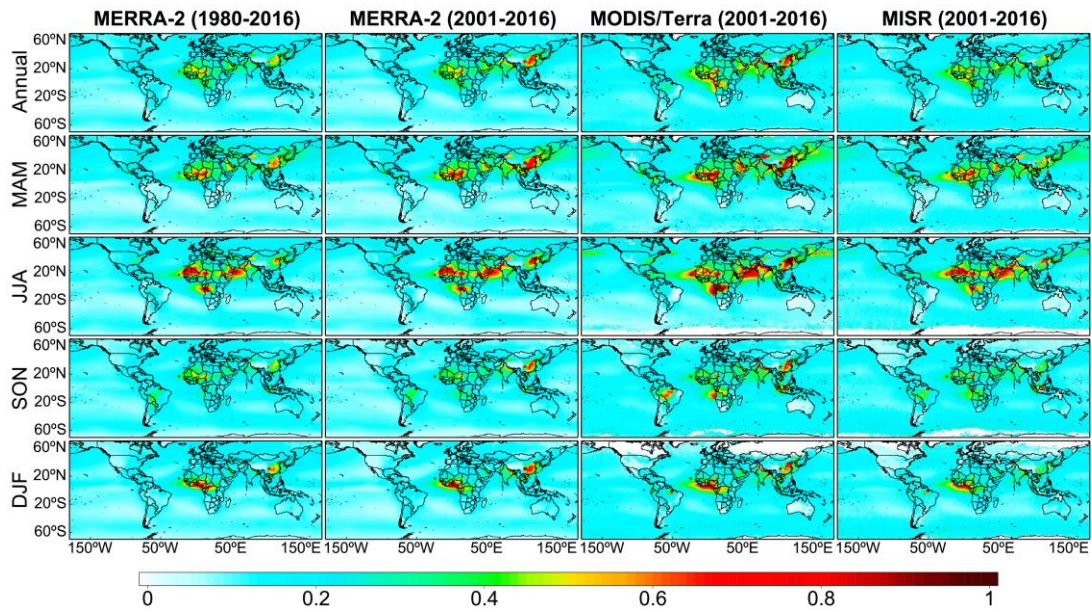

**Fig. S6.** Spatial distributions of annual and seasonal mean AODs during different periods for different AOD products. The first column represents spatial distribution of the annual and seasonal mean MERRA-2 AOD for 1980-2016, while the second and fourth columns represent the annual and seasonal spatial distribution of MERRA-2, MODIS and MISR AODs for 2001-2016, respectively.

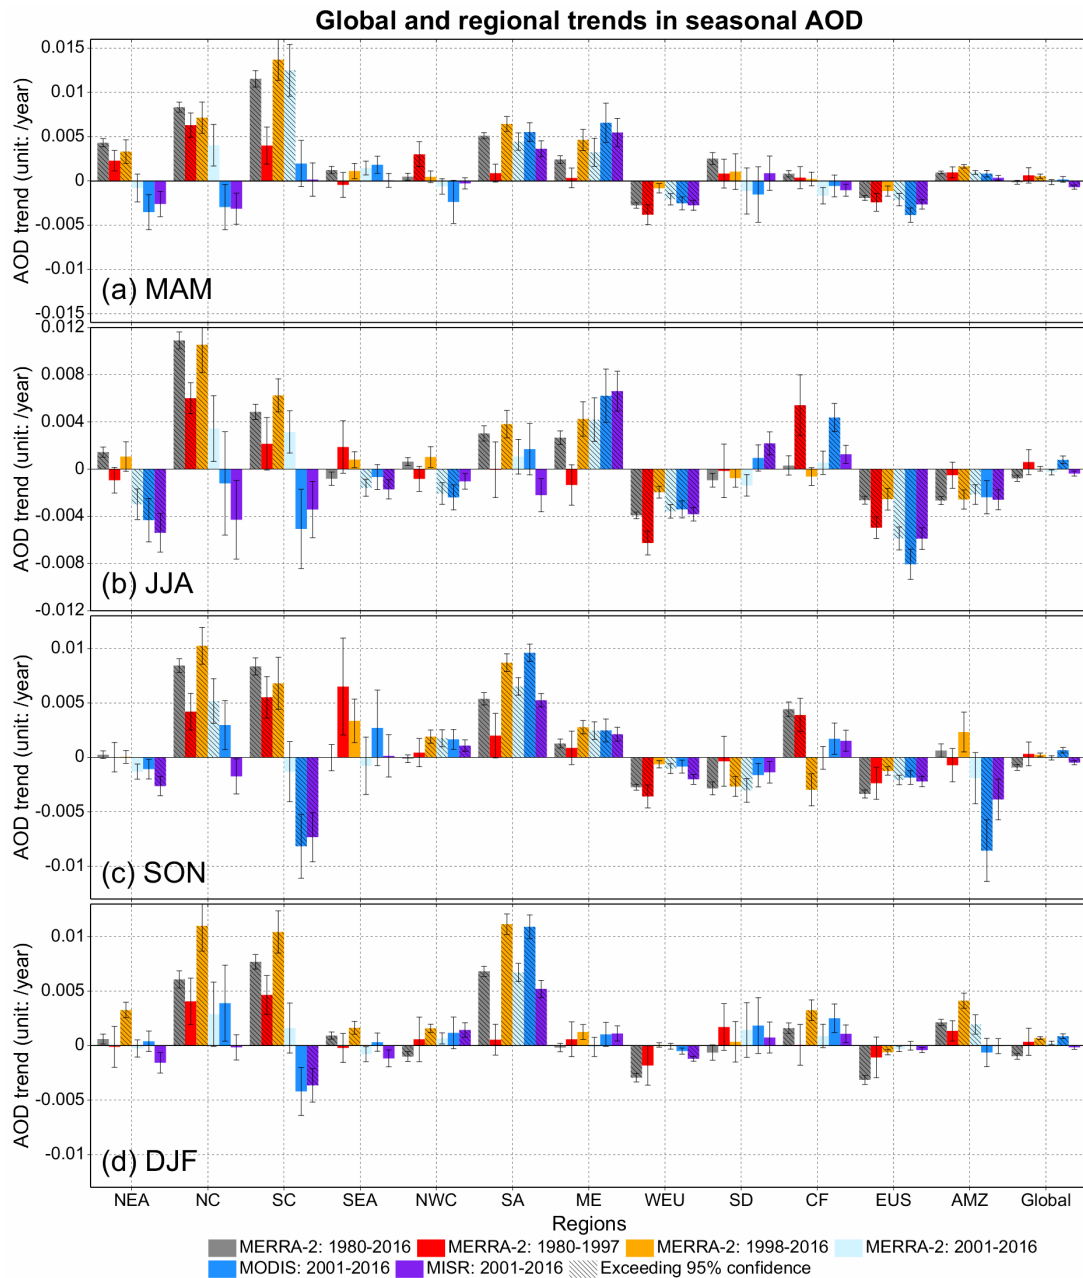

**Fig. S7.** Inter-comparisons of global and regional seasonal trends in AOD calculated from the time series value of de-seasonalized monthly anomaly of MERRA-2, MODIS/Terra and MISR during the four periods of 1980–2016, 1980–1997, 1998–2016, and 2001–2016. Error bars represent the uncertainty associated with the calculated trend. The trend bars with shadow indicate statistical significance at the 95% confidence level.

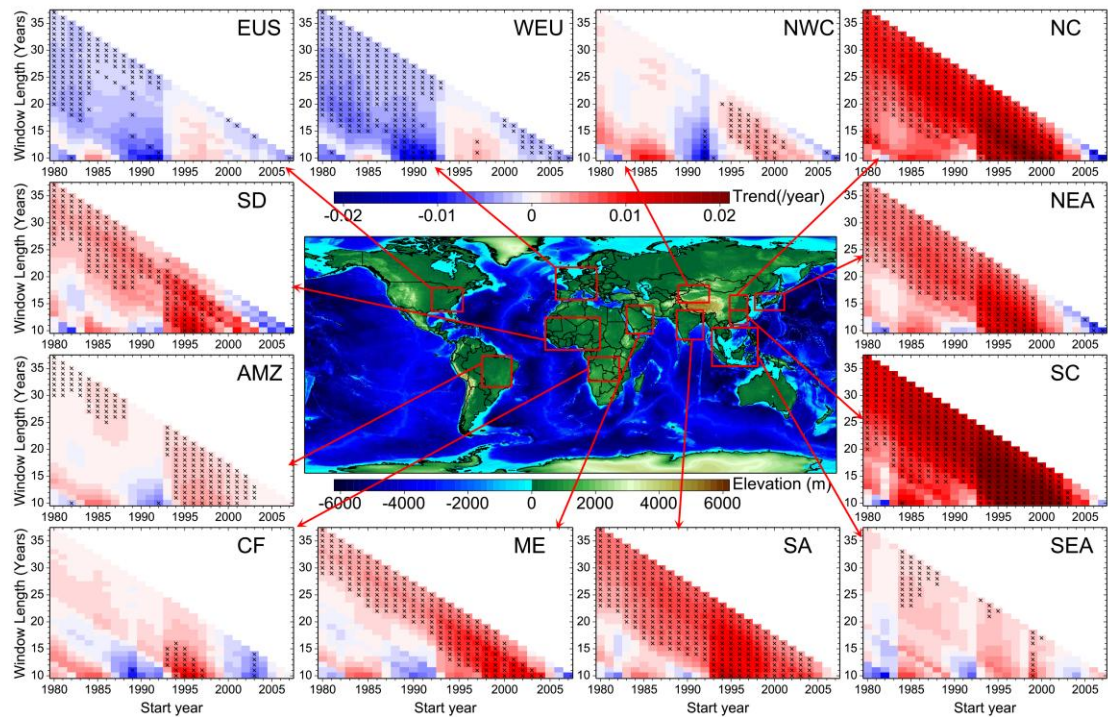

**Fig. S8.** Sliding-window trend analyses of the Spring (March, April, and May) mean MERRA-2 AOD from 1998 to 2016 over the 12 ROIs (see Figure 1 for names and locations of regions), with at least 10 years used to calculate trends. The  $x$ -axis and  $y$ -axis indicate the start year and the length of the time series to calculate the trend, respectively. The colors of rectangles represent the intensity of the trend (units: /year), and those with black 'x' signs indicate linear trends above the 95% significance level.

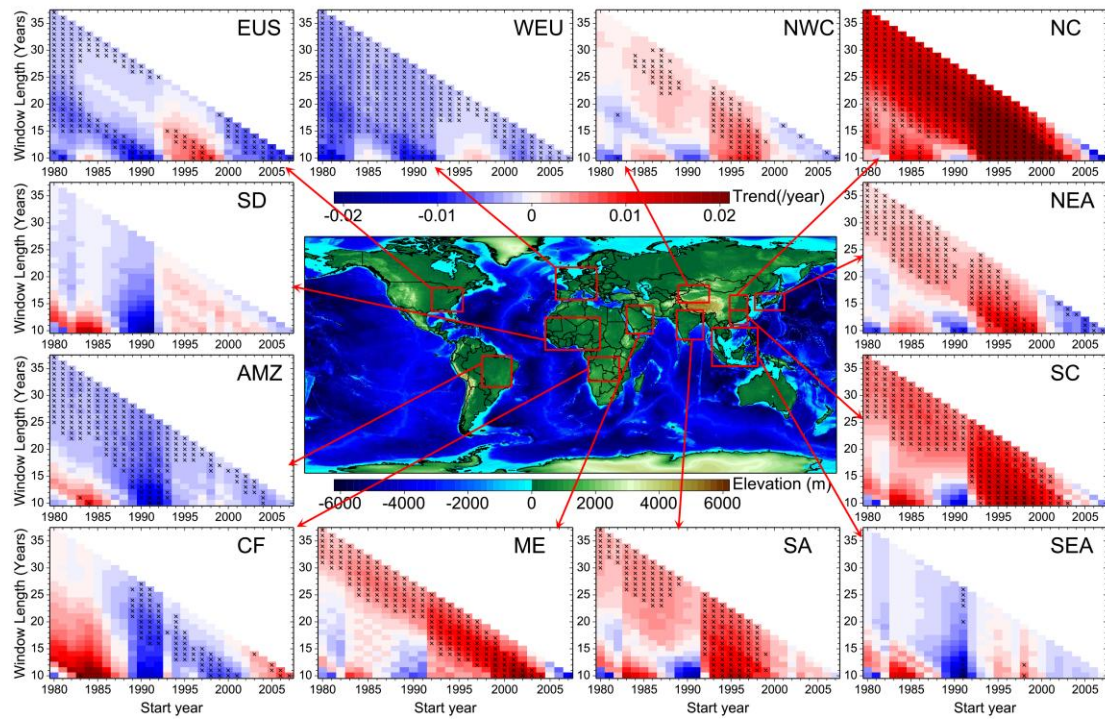

**Fig. S9.** The same as Figure S8, but for the Summer (June, July, and August).

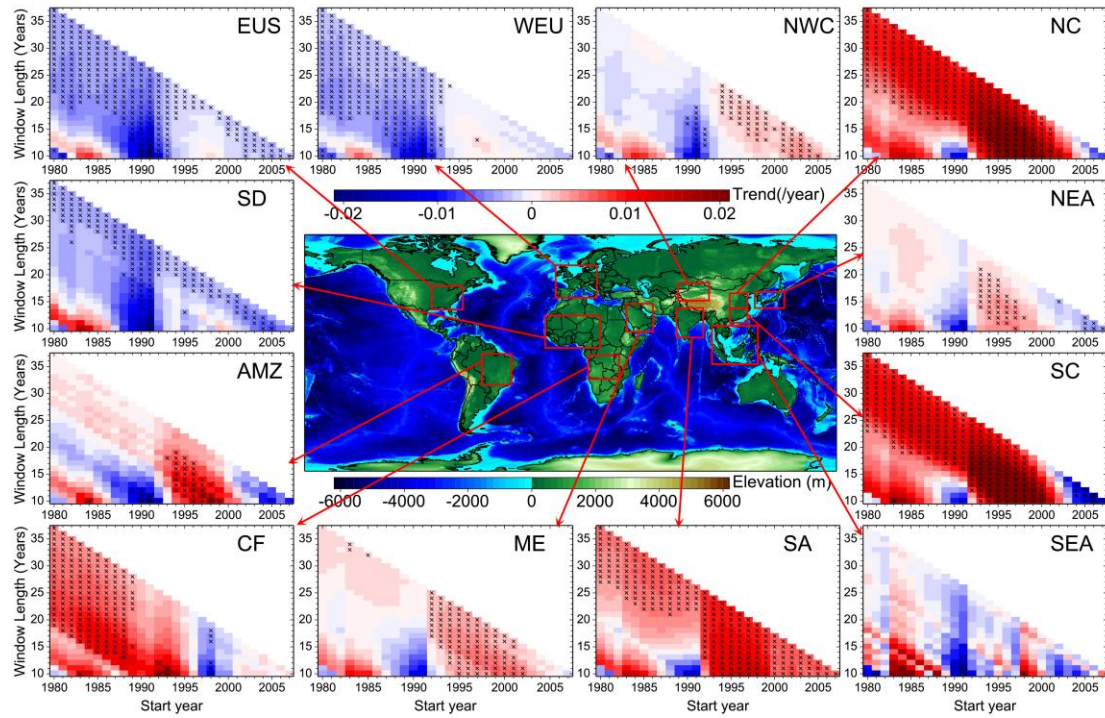

**Fig. S10.** The same as Figure S8, but for the Autumn (September, October, and November).

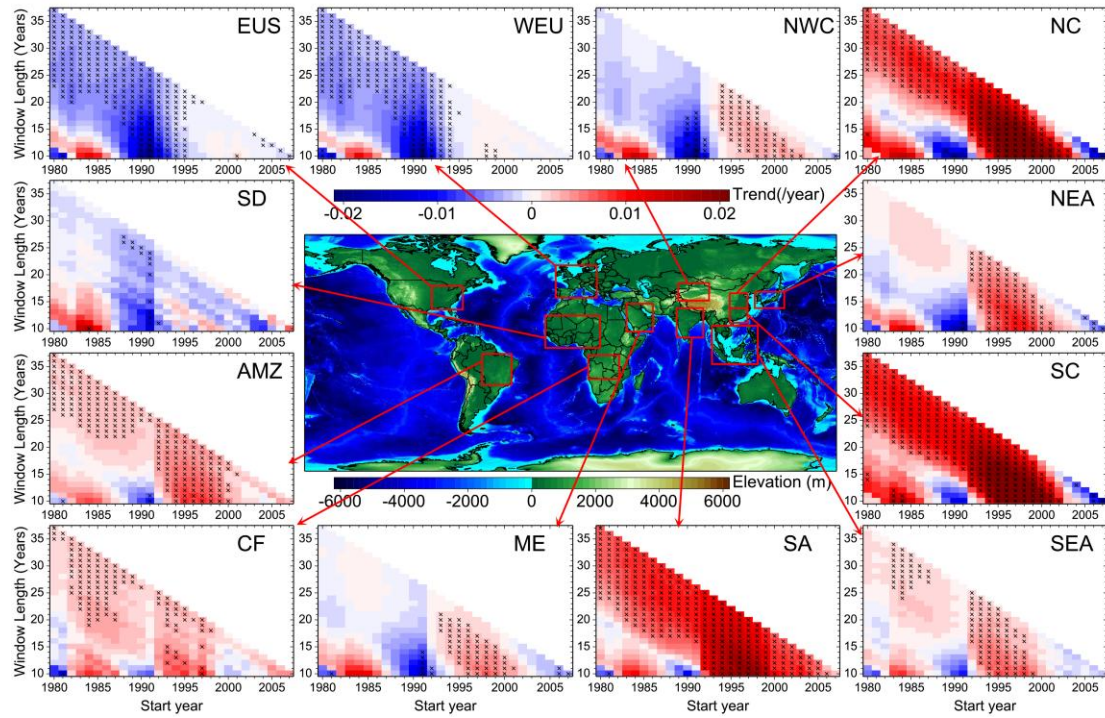

**Fig. S11.** The same as Figure S8, but for the Winter (December, January, and February).



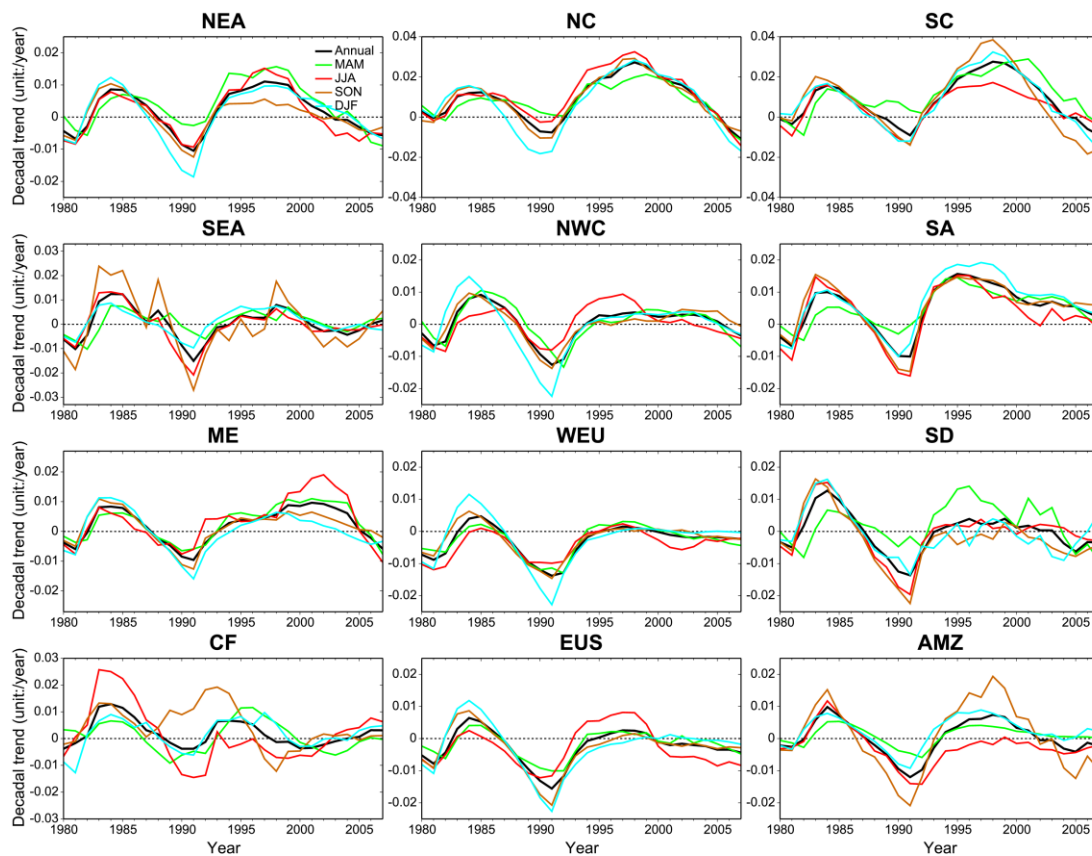

**Fig. S12.** Time series of decadal trends in the annual and seasonal mean AOD for the 12 ROIs. The trends are calculated for each 10-year interval starting from 1998 to 2006 ( $x$ -axis).

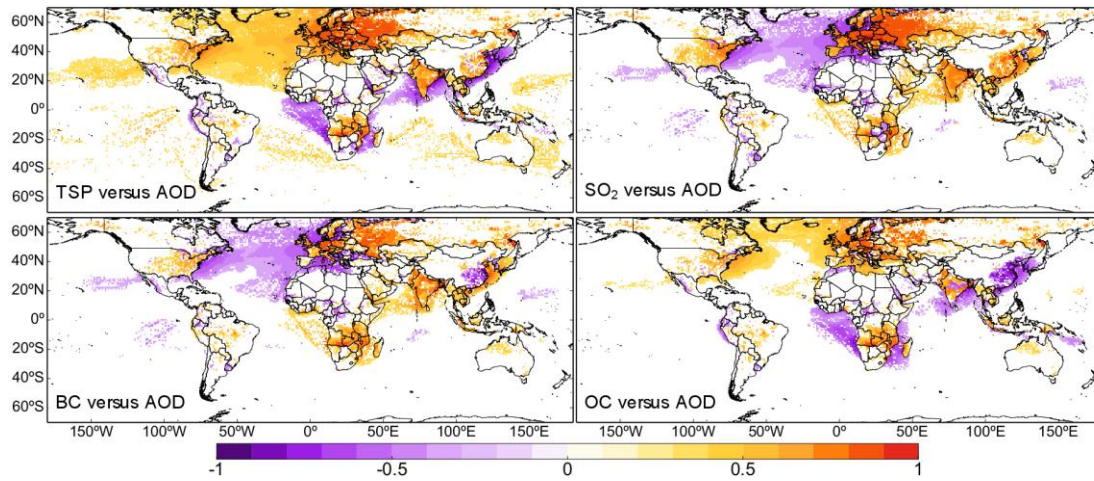

**Fig. S13.** Spatial distributions of the  $R$  between MERRA-2 AOD and total anthropogenic emissions of total suspended particles (TSP),  $\text{SO}_2$ , black carbon (BC), and organic carbon (OC) for the period of 1980-2014. Only the  $R$  with 95% confidence level was shown.

1980-1997

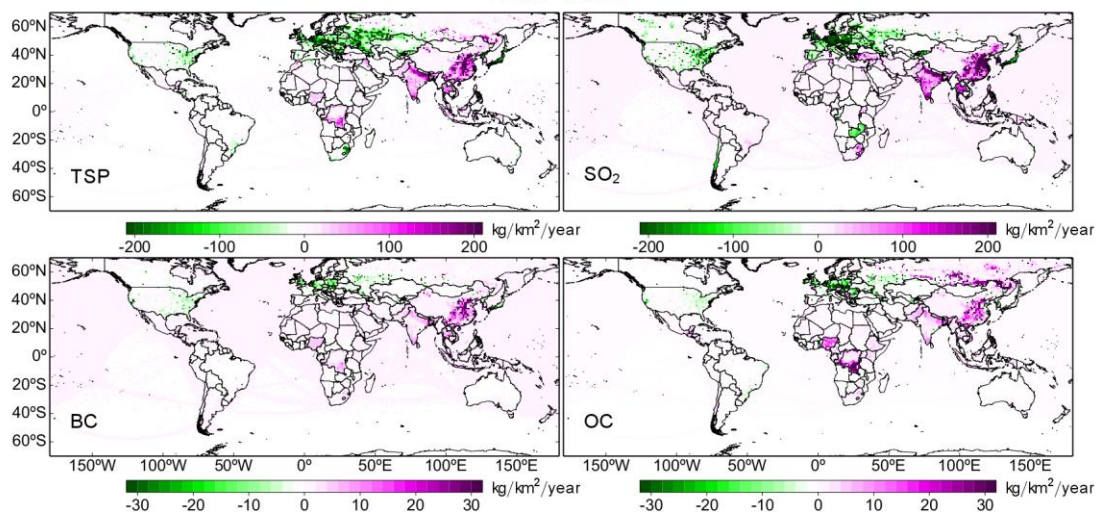

**Fig. S14.** Spatial distributions of linear trends (units: kg/km<sup>2</sup>/year) in total anthropogenic emissions of TSP, SO<sub>2</sub>, BC, and OC during 1980–1997 derived from the Peking University emissions inventory (<http://inventory.pku.edu.cn/>). Only linear trend values with statistical significance at the 95% confidence level are shown.

1980-1997

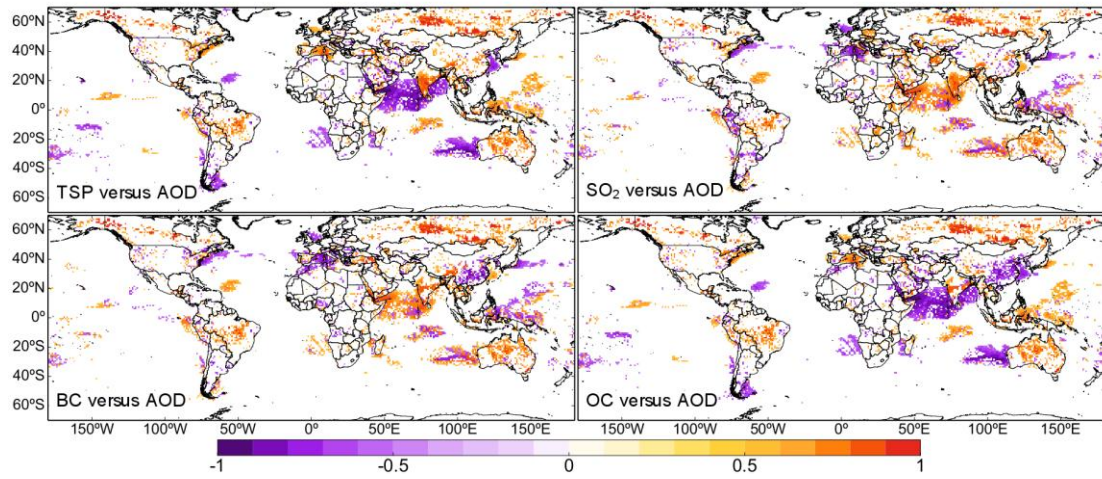

**Fig. S15.** Spatial distributions of the  $R$  between MERRA-2 AOD and total anthropogenic emissions of TSP,  $\text{SO}_2$ , BC, and OC for 1980–1997. Only the  $R$  with 95% confidence level was shown.

1998-2014

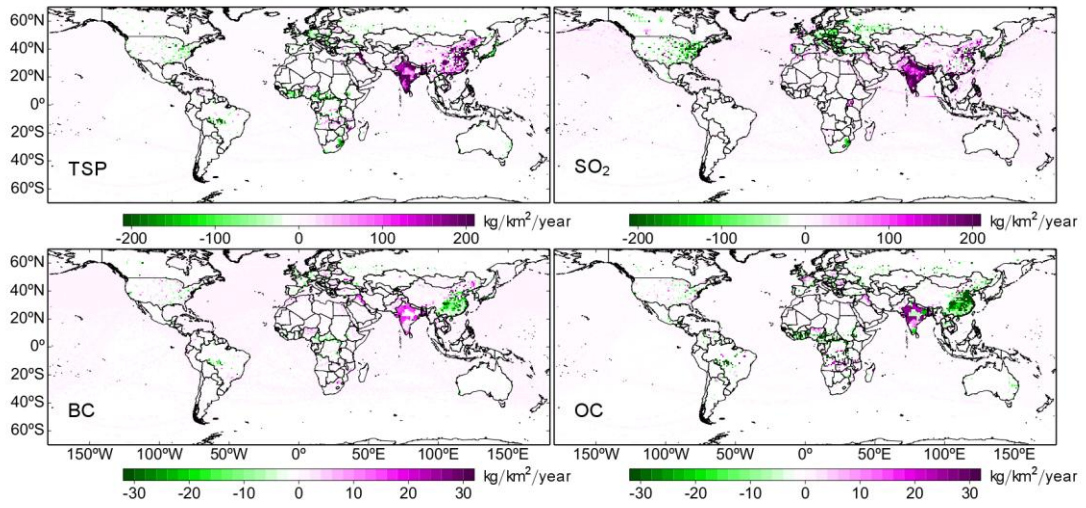

Fig. S16. The same as Figure S14, but for 1998-2014.

1998-2014

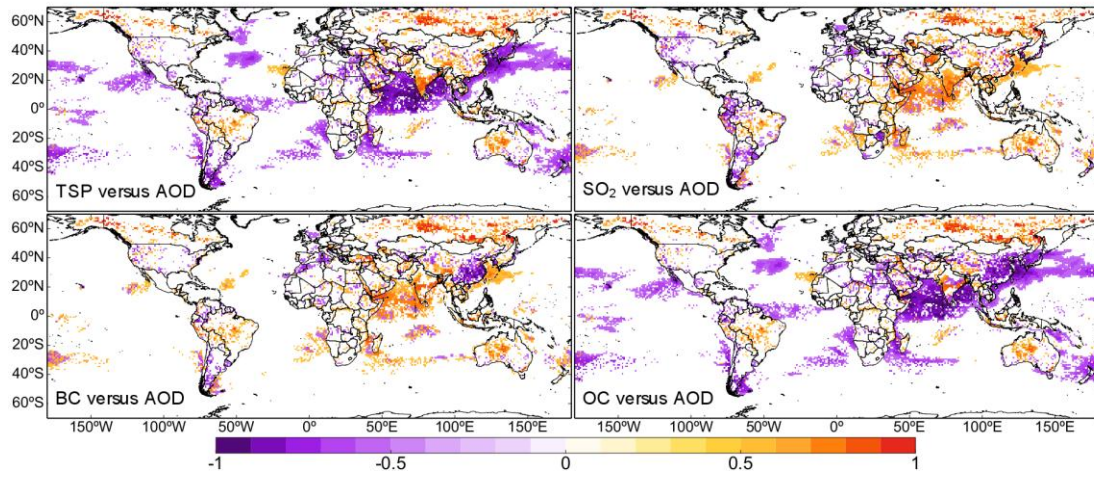

**Fig. S17.** The same as Figure S15, but for 1998-2014.

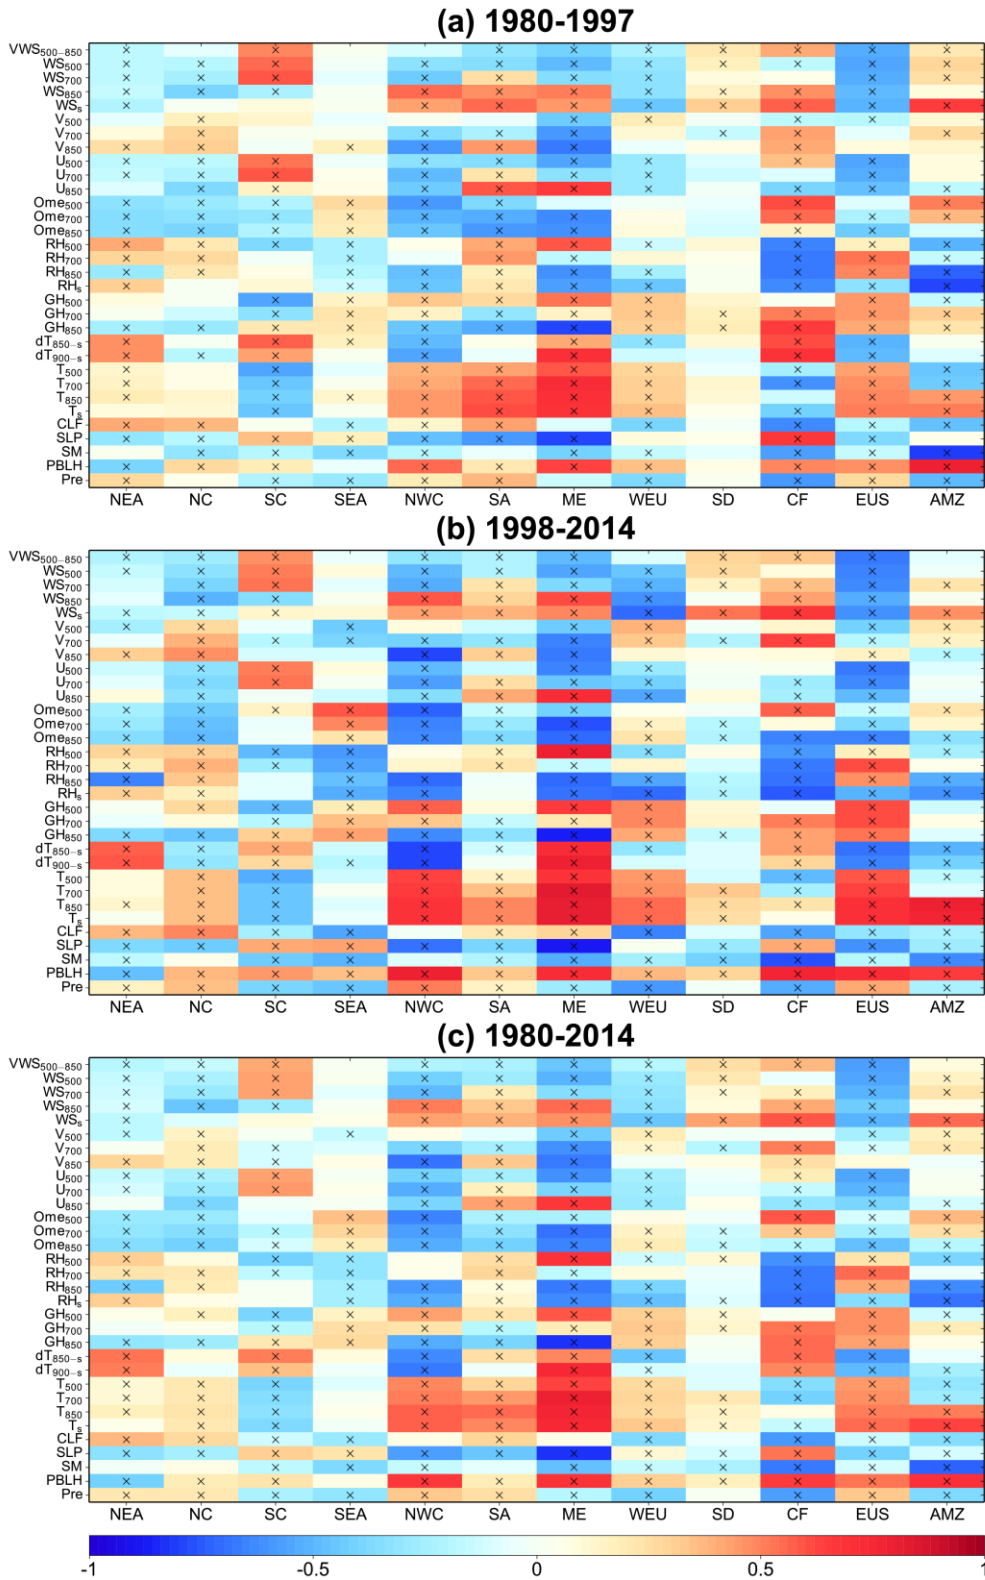

**Fig. S18.** Pearson's  $R$  for spatially-averaged, MERRA-2 AOD versus meteorological variables during (a) 1980–1997 (top panel), (b) 1998–2014 (middle panel), and (c) 1980–2014 (bottom panel) over the 12 ROIs. Colored squares marked with 'x' signs indicate  $R$  above 95% significance level.

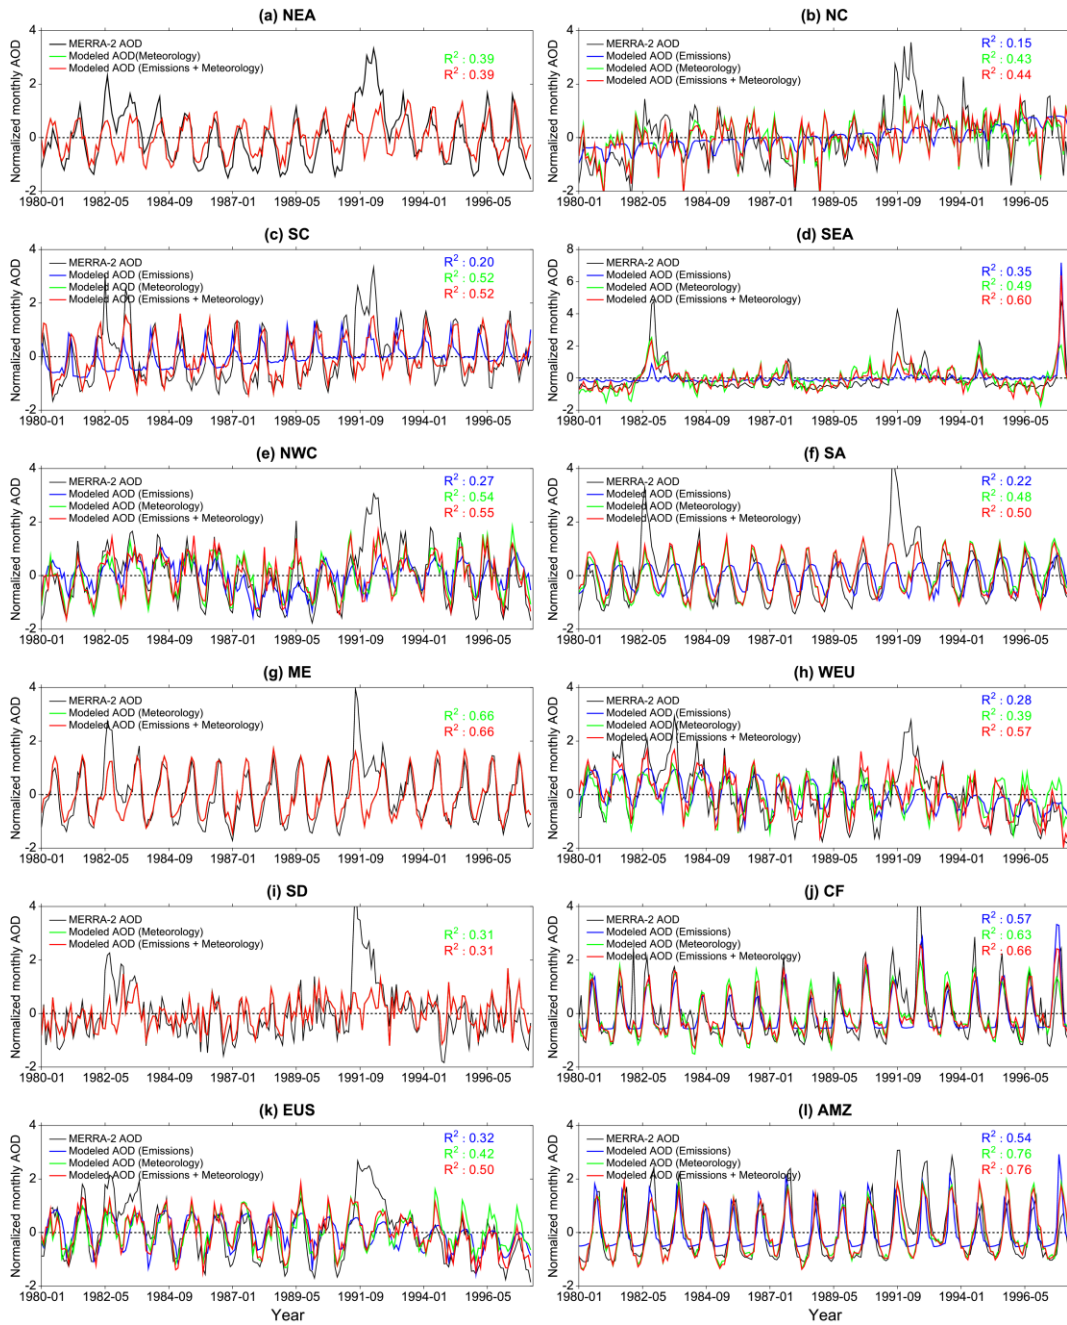

**Fig. S19.** Time series of MERRA-2 (in black) and modeled AOD monthly normalized anomalies from 1980 to 1997 over the 12 regions of interest. The coefficient of determination ( $R^2$ ) of the regression fit of the stepwise MLR model with emission factors (in blue), meteorology (in green), and both emissions and meteorology (in red) as predictors are given in the top-right of each panel.



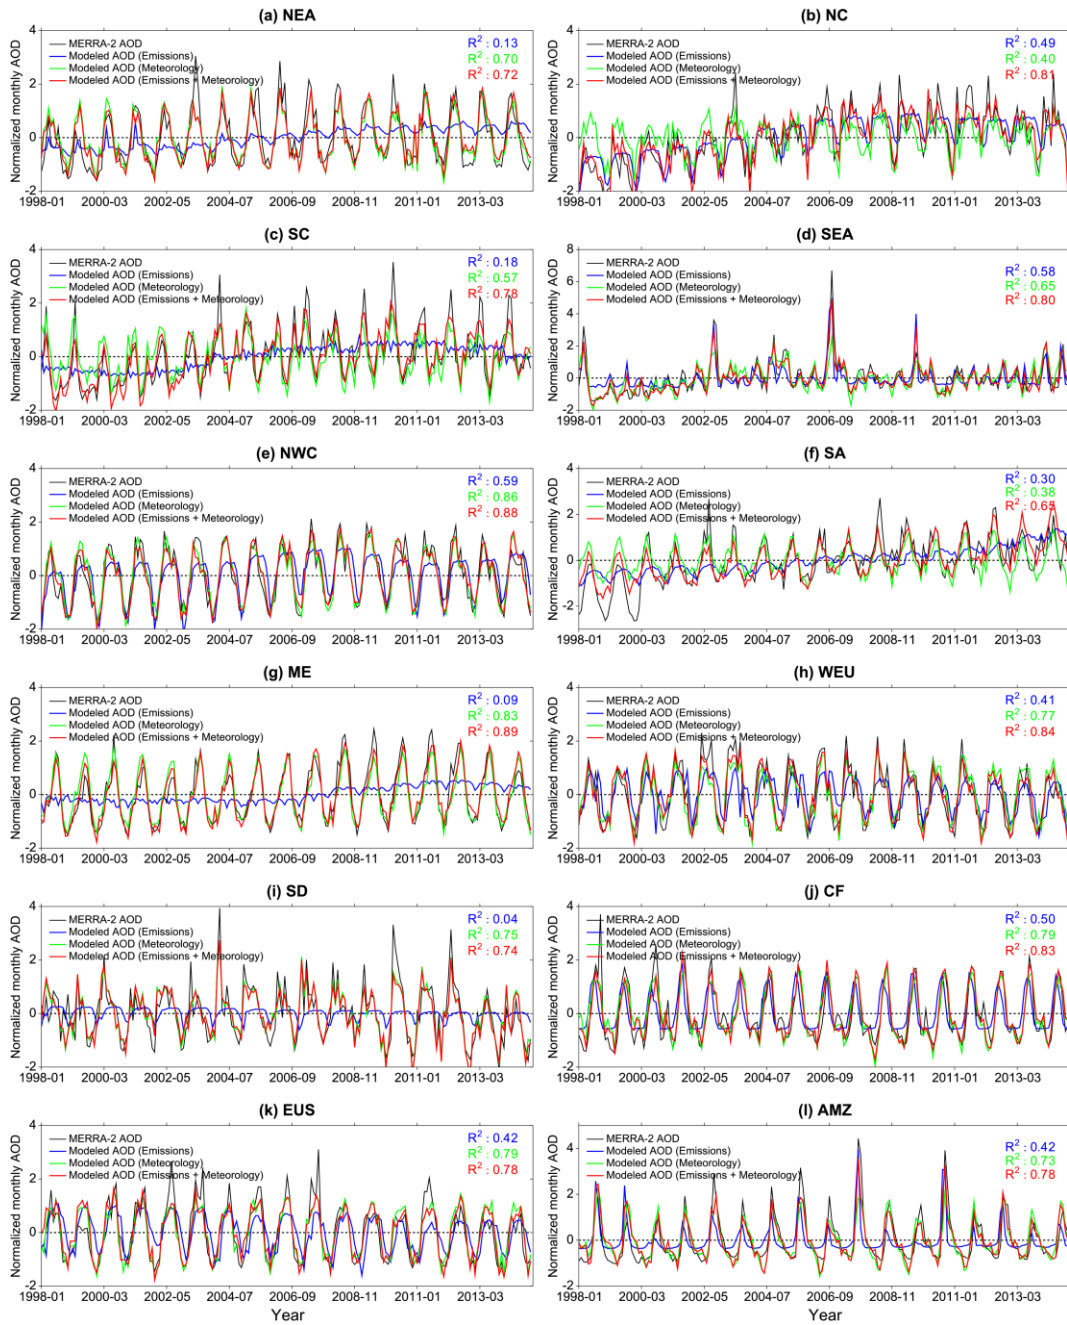

**Fig. S20.** Time series of MERRA-2 (in black) and modeled AOD monthly normalized anomalies from 1998 to 2014 over the 12 regions of interest. The coefficient of determination ( $R^2$ ) of the regression fit of the stepwise MLR model with emission factors (in blue), meteorology (in green), and both emissions and meteorology (in red) as predictors are given in the top-right of each panel.

**Table S1.** Global and regional annual and seasonal trends (unit: /year) derived based upon MERRA-2, MODIS/Terra and MISR AOD datasets during the four historical periods, 1980-2016, 1980-1997, 1998-2016, and 2001-2016. Bold font indicates the trend is statistically significant at the 95% level.

| Seasonal | Dataset (period)    | Regions         |                 |                 |                 |                 |                |                |                 |                 |                 |                 |                 |                 |
|----------|---------------------|-----------------|-----------------|-----------------|-----------------|-----------------|----------------|----------------|-----------------|-----------------|-----------------|-----------------|-----------------|-----------------|
|          |                     | NEA             | NC              | SC              | SEA             | NWC             | SA             | ME             | WEU             | SD              | CF              | WUS             | AMZ             | Global          |
| Annual   | MERRA-2 (1980-2016) | <b>0.00171</b>  | <b>0.00855</b>  | <b>0.00819</b>  | 0.00037         | 0.00005         | <b>0.00508</b> | <b>0.00155</b> | <b>-0.00307</b> | -0.00047        | <b>0.00175</b>  | <b>-0.00274</b> | 0.00028         | <b>-0.00068</b> |
|          | MERRA-2 (1980-1997) | 0.00038         | <b>0.00529</b>  | <b>0.00412</b>  | 0.00202         | 0.00089         | 0.00094        | 0.00012        | <b>-0.00382</b> | 0.00043         | <b>0.00216</b>  | <b>-0.00270</b> | 0.00026         | 0.00050         |
|          | MERRA-2 (1998-2016) | <b>0.00192</b>  | <b>0.00973</b>  | <b>0.00929</b>  | <b>0.00173</b>  | <b>0.00124</b>  | <b>0.00752</b> | <b>0.00323</b> | <b>-0.00084</b> | -0.00051        | -0.00004        | <b>-0.00139</b> | <b>0.00138</b>  | <b>0.00038</b>  |
|          | MERRA-2 (2001-2016) | -0.00110        | <b>0.00447</b>  | <b>0.00487</b>  | -0.00018        | -0.00003        | <b>0.00476</b> | <b>0.00251</b> | <b>-0.00167</b> | -0.00102        | -0.00012        | <b>-0.00263</b> | -0.00016        | -0.00002        |
|          | MODIS (2001-2016)   | <b>-0.00199</b> | 0.00117         | <b>-0.00325</b> | 0.00122         | -0.00034        | <b>0.00696</b> | <b>0.00419</b> | <b>-0.00185</b> | -0.00006        | <b>0.00179</b>  | <b>-0.00345</b> | <b>-0.00261</b> | <b>0.00066</b>  |
|          | MISR (2001-2016)    | <b>-0.00286</b> | <b>-0.00225</b> | <b>-0.00330</b> | -0.00060        | 0.00023         | <b>0.00288</b> | <b>0.00386</b> | <b>-0.00247</b> | 0.00053         | 0.00055         | <b>-0.00282</b> | <b>-0.00158</b> | <b>-0.00043</b> |
| Spring   | MERRA-2 (1980-2016) | <b>0.00432</b>  | <b>0.00833</b>  | <b>0.01153</b>  | <b>0.00122</b>  | 0.00048         | <b>0.00510</b> | 0.00242        | <b>-0.00277</b> | <b>0.00252</b>  | <b>0.00080</b>  | <b>-0.00192</b> | <b>0.00095</b>  | -0.00016        |
|          | MERRA-2 (1980-1997) | 0.00228         | <b>0.00630</b>  | 0.00399         | -0.00045        | <b>0.00300</b>  | 0.00087        | 0.00033        | <b>-0.00382</b> | 0.00083         | 0.00037         | <b>-0.00242</b> | 0.00096         | 0.00062         |
|          | MERRA-2 (1998-2016) | <b>0.00331</b>  | <b>0.00714</b>  | <b>0.01370</b>  | 0.00112         | 0.00046         | <b>0.00643</b> | <b>0.00463</b> | -0.00084        | 0.00104         | 0.00021         | -0.00115        | <b>0.00164</b>  | <b>0.00053</b>  |
|          | MERRA-2 (2001-2016) | -0.00081        | 0.00403         | <b>0.01250</b>  | 0.00145         | -0.00063        | <b>0.00444</b> | <b>0.00323</b> | <b>-0.00208</b> | -0.00114        | -0.00168        | <b>-0.00213</b> | <b>0.00096</b>  | -0.00014        |
|          | MODIS (2001-2016)   | -0.00354        | -0.00296        | 0.00197         | 0.00182         | -0.00238        | <b>0.00551</b> | <b>0.00657</b> | <b>-0.00254</b> | -0.00154        | -0.00057        | <b>-0.00386</b> | <b>0.00082</b>  | 0.00016         |
|          | MISR (2001-2016)    | -0.00261        | -0.00315        | 0.00015         | 0.00006         | -0.00028        | <b>0.00363</b> | <b>0.00546</b> | <b>-0.00276</b> | 0.00087         | -0.00105        | <b>-0.00265</b> | 0.00035         | <b>-0.00070</b> |
| Summer   | MERRA-2 (1980-2016) | <b>0.00144</b>  | <b>0.01090</b>  | <b>0.00485</b>  | -0.00081        | 0.00064         | <b>0.00303</b> | <b>0.00267</b> | <b>-0.00392</b> | -0.00094        | 0.00031         | <b>-0.00263</b> | <b>-0.00266</b> | <b>-0.00078</b> |
|          | MERRA-2 (1980-1997) | -0.00094        | <b>0.00601</b>  | 0.00215         | 0.00188         | -0.00083        | -0.00005       | -0.00134       | <b>-0.00626</b> | -0.00015        | <b>0.00542</b>  | <b>-0.00496</b> | -0.00052        | 0.00060         |
|          | MERRA-2 (1998-2016) | 0.00107         | <b>0.01054</b>  | <b>0.00625</b>  | 0.00080         | 0.00103         | <b>0.00382</b> | <b>0.00425</b> | <b>-0.00196</b> | -0.00076        | -0.00063        | <b>-0.00255</b> | <b>-0.00257</b> | 0.00003         |
|          | MERRA-2 (2001-2016) | <b>-0.00298</b> | 0.00344         | 0.00315         | <b>-0.00158</b> | <b>-0.00206</b> | 0.00106        | <b>0.00419</b> | <b>-0.00358</b> | -0.00137        | 0.00054         | <b>-0.00588</b> | <b>-0.00215</b> | -0.00028        |
|          | MODIS (2001-2016)   | <b>-0.00433</b> | -0.00121        | -0.00506        | -0.00067        | <b>-0.00239</b> | 0.00169        | <b>0.00622</b> | <b>-0.00341</b> | 0.00095         | <b>0.00437</b>  | <b>-0.00806</b> | -0.00238        | <b>0.00079</b>  |
|          | MISR (2001-2016)    | <b>-0.00539</b> | -0.00429        | -0.00342        | <b>-0.00172</b> | -0.00103        | -0.00221       | <b>0.00661</b> | <b>-0.00382</b> | <b>0.00218</b>  | 0.00126         | <b>-0.00589</b> | <b>-0.00259</b> | -0.00037        |
| Autumn   | MERRA-2 (1980-2016) | 0.00025         | <b>0.00843</b>  | <b>0.00836</b>  | -0.00003        | -0.00013        | <b>0.00538</b> | <b>0.00128</b> | <b>-0.00274</b> | <b>-0.00284</b> | <b>0.00442</b>  | <b>-0.00335</b> | 0.00063         | <b>-0.00092</b> |
|          | MERRA-2 (1980-1997) | 0.00003         | <b>0.00420</b>  | <b>0.00551</b>  | 0.00650         | 0.00044         | 0.00200        | 0.00088        | <b>-0.00358</b> | -0.00036        | <b>0.00389</b>  | -0.00237        | -0.00072        | 0.00032         |
|          | MERRA-2 (1998-2016) | 0.00005         | <b>0.01025</b>  | <b>0.00679</b>  | 0.00335         | <b>0.00191</b>  | <b>0.00869</b> | <b>0.00277</b> | -0.00063        | <b>-0.00267</b> | <b>-0.00297</b> | <b>-0.00125</b> | 0.00233         | 0.00024         |
|          | MERRA-2 (2001-2016) | -0.00130        | <b>0.00517</b>  | -0.00131        | -0.00078        | <b>0.00176</b>  | <b>0.00652</b> | <b>0.00245</b> | <b>-0.00103</b> | <b>-0.00303</b> | -0.00004        | <b>-0.00207</b> | -0.00190        | -0.00005        |
|          | MODIS (2001-2016)   | -0.00107        | 0.00297         | <b>-0.00816</b> | 0.00271         | 0.00166         | <b>0.00960</b> | <b>0.00247</b> | -0.00084        | -0.00162        | 0.00171         | <b>-0.00185</b> | <b>-0.00856</b> | <b>0.00066</b>  |
|          | MISR (2001-2016)    | <b>-0.00263</b> | -0.00174        | <b>-0.00732</b> | 0.00014         | <b>0.00108</b>  | <b>0.00525</b> | <b>0.00213</b> | <b>-0.00201</b> | -0.00137        | 0.00153         | <b>-0.00221</b> | <b>-0.00386</b> | <b>-0.00048</b> |
| Winter   | MERRA-2 (1980-2016) | 0.00061         | <b>0.00608</b>  | <b>0.00769</b>  | <b>0.00093</b>  | <b>-0.00100</b> | <b>0.00682</b> | -0.00017       | <b>-0.00294</b> | -0.00063        | <b>0.00161</b>  | <b>-0.00314</b> | <b>0.00213</b>  | <b>-0.00097</b> |
|          | MERRA-2 (1980-1997) | -0.00011        | 0.00407         | <b>0.00465</b>  | -0.00021        | 0.00058         | 0.00055        | 0.00059        | -0.00183        | 0.00171         | 0.00007         | -0.00108        | 0.00136         | 0.00036         |
|          | MERRA-2 (1998-2016) | <b>0.00327</b>  | <b>0.01100</b>  | <b>0.01043</b>  | <b>0.00164</b>  | <b>0.00159</b>  | <b>0.01115</b> | 0.00126        | 0.00006         | 0.00035         | <b>0.00325</b>  | <b>-0.00060</b> | <b>0.00413</b>  | <b>0.00070</b>  |
|          | MERRA-2 (2001-2016) | -0.00026        | 0.00288         | 0.00162         | -0.00078        | 0.00066         | <b>0.00673</b> | -0.00012       | -0.00005        | 0.00143         | 0.00089         | -0.00029        | <b>0.00195</b>  | 0.00025         |
|          | MODIS (2001-2016)   | 0.00040         | 0.00391         | -0.00420        | 0.00032         | 0.00118         | <b>0.01092</b> | 0.00104        | -0.00050        | 0.00185         | 0.00251         | -0.00002        | -0.00063        | <b>0.00086</b>  |
|          | MISR (2001-2016)    | -0.00157        | -0.00016        | <b>-0.00365</b> | -0.00117        | <b>0.00144</b>  | <b>0.00521</b> | 0.00112        | <b>-0.00120</b> | 0.00075         | 0.00109         | -0.00041        | -0.00004        | -0.00015        |

**Table S2.** Stepwise multiple linear regression (MLR) models for monthly AOD over the 12 ROIs during three different periods: 1980-1997, 1998-2014, and 1980-2014. Note that after implementing variable filtering based on stepwise MLR model, the number of explanatory variables retained for each ROI is different.

| ROIs | 1980-1997             |                |                                                                                                                                                   |                |                                                                                                                                |                | 1998-2014                 |                |                                                                                                                                                        |                |                                                                                                                                                                        |                | 1980-2014                     |                |                                                                                                                         |                |                                                                                                                                           |                |
|------|-----------------------|----------------|---------------------------------------------------------------------------------------------------------------------------------------------------|----------------|--------------------------------------------------------------------------------------------------------------------------------|----------------|---------------------------|----------------|--------------------------------------------------------------------------------------------------------------------------------------------------------|----------------|------------------------------------------------------------------------------------------------------------------------------------------------------------------------|----------------|-------------------------------|----------------|-------------------------------------------------------------------------------------------------------------------------|----------------|-------------------------------------------------------------------------------------------------------------------------------------------|----------------|
|      | Emissions             | R <sup>2</sup> | Meteorology                                                                                                                                       | R <sup>2</sup> | Emissions + Meteorology                                                                                                        | R <sup>2</sup> | Emissions                 | R <sup>2</sup> | Meteorology                                                                                                                                            | R <sup>2</sup> | Emissions + Meteorology                                                                                                                                                | R <sup>2</sup> | Emissions                     | R <sup>2</sup> | Meteorology                                                                                                             | R <sup>2</sup> | Emissions+ Meteorology                                                                                                                    | R <sup>2</sup> |
| NEA  | /                     | /              | dT <sub>850-s</sub> , GH <sub>700</sub> , Ome <sub>500</sub>                                                                                      | 0.39           | dT <sub>850-s</sub> , GH <sub>700</sub> , Ome <sub>500</sub>                                                                   | 0.39           | BC, OC                    | 0.13           | RH <sub>850</sub> , GH <sub>850</sub> , Ome <sub>850</sub> , T <sub>s</sub>                                                                            | 0.70           | RH <sub>850</sub> , CLF, GH <sub>850</sub> , TSP, OME <sub>850</sub> , T <sub>s</sub>                                                                                  | 0.72           | BC, OC                        | 0.14           | dT <sub>850-s</sub> , GH <sub>500</sub>                                                                                 | 0.50           | GH <sub>500</sub> , PBLH, BC, VWS <sub>500-850</sub> , Pre                                                                                | 0.60           |
| NC   | SO <sub>2</sub> , TSP | 0.15           | WS <sub>850</sub> , SM, RH <sub>850</sub> , GH <sub>700</sub> , dT <sub>850-s</sub>                                                               | 0.43           | WS <sub>850</sub> , SM, RH <sub>850</sub> , GH <sub>700</sub> , SO <sub>2</sub>                                                | 0.44           | SO <sub>2</sub> , TSP, BC | 0.49           | WS <sub>850</sub> , GH <sub>850</sub> , VWS <sub>500-850</sub> , SM                                                                                    | 0.40           | SO <sub>2</sub> , GH <sub>700</sub> , Ome <sub>850</sub> , WS <sub>850</sub> , WS <sub>s</sub> , Pre, BC, TSP, CLF                                                     | 0.81           | SO <sub>2</sub> , BC, TSP     | 0.58           | WS <sub>850</sub> , dT <sub>850-s</sub> , GH <sub>850</sub> , U <sub>850</sub> , V <sub>700</sub> , dT <sub>900-s</sub> | 0.42           | SO <sub>2</sub> , BC, TSP, GH <sub>700</sub> , WS <sub>850</sub> , RH <sub>850</sub> , SM                                                 | 0.76           |
| SC   | OC                    | 0.20           | PBLH, Ome <sub>700</sub> , dT <sub>850-s</sub> , T <sub>500</sub>                                                                                 | 0.52           | PBLH, Ome <sub>700</sub> , dT <sub>850-s</sub> , T <sub>500</sub>                                                              | 0.52           | TSP, SO <sub>2</sub>      | 0.18           | Ome <sub>850</sub> , Pre, RH <sub>s</sub> , WS <sub>700</sub> , V <sub>700</sub>                                                                       | 0.57           | BC, Ome <sub>850</sub> , Pre, SO <sub>2</sub> , V <sub>700</sub> , WS <sub>700</sub> , RH <sub>s</sub> , V <sub>500</sub> , TSP, PBLH, V <sub>850</sub>                | 0.78           | SO <sub>2</sub> , BC, OC, TSP | 0.37           | dT <sub>850-s</sub> , PBLH, Ome <sub>700</sub> , V <sub>700</sub> , Pre, T <sub>s</sub> , WS <sub>700</sub>             | 0.49           | BC, PBLH, TSP, Ome <sub>850</sub> , T <sub>500</sub> , SO <sub>2</sub> , Pre, V <sub>700</sub> , WS <sub>700</sub>                        | 0.73           |
| SEA  | BC                    | 0.35           | SM, dT <sub>900-s</sub> , PBLH, RH <sub>500</sub> , Ome <sub>700</sub> , V <sub>500</sub> , T <sub>s</sub> , V <sub>850</sub> , WS <sub>500</sub> | 0.49           | BC, SM, U <sub>500</sub> , T <sub>s</sub> , WS <sub>500</sub> , V <sub>850</sub> , RH <sub>850</sub> , RH <sub>500</sub> , Pre | 0.60           | BC                        | 0.58           | V <sub>500</sub> , T <sub>700</sub> , SM, Pre, V <sub>850</sub> , RH <sub>500</sub> , WS <sub>500</sub> , PBLH, T <sub>850</sub> , RH <sub>s</sub>     | 0.65           | BC, RH <sub>500</sub> , SO <sub>2</sub> , WS <sub>500</sub> , U <sub>500</sub> , WS <sub>700</sub> , SM, T <sub>700</sub> , V <sub>500</sub> , WS <sub>850</sub> , Pre | 0.80           | BC                            | 0.37           | SM, dT <sub>850-s</sub> , T <sub>500</sub> , U <sub>850</sub> , Ome <sub>850</sub> , Ome <sub>500</sub> , Pre           | 0.33           | BC, SM, T <sub>700</sub> , dT <sub>900-s</sub> , PBLH, SO <sub>2</sub> , V <sub>500</sub> , dT <sub>850-s</sub> , GH <sub>500</sub> , Pre | 0.55           |
| NWC  | SO <sub>2</sub> , OC  | 0.27           | Ome <sub>500</sub> , U <sub>850</sub> , WS <sub>850</sub> , CLF, RH <sub>s</sub>                                                                  | 0.54           | Ome <sub>500</sub> , U <sub>850</sub> , TSP, Pre, V <sub>500</sub> , WS <sub>850</sub> , Ome <sub>700</sub>                    | 0.55           | BC, TSP, SO <sub>2</sub>  | 0.59           | WS <sub>s</sub> , PBLH, U <sub>850</sub> , dT <sub>900-s</sub> , CLF, RH <sub>700</sub> , SM                                                           | 0.86           | WS <sub>s</sub> , BC, U <sub>700</sub> , TSP, PBLH, CLF, RH <sub>700</sub> , OC, WS <sub>850</sub>                                                                     | 0.88           | OC, SO <sub>2</sub> , TSP, BC | 0.37           | V <sub>850</sub> , CLF, RH <sub>s</sub> , U <sub>850</sub> , V <sub>700</sub> , dT <sub>850-s</sub>                     | 0.65           | V <sub>850</sub> , CLF, RH <sub>s</sub> , U <sub>850</sub> , V <sub>700</sub> , dT <sub>850-s</sub> , BC                                  | 0.67           |
| SA   | OC, TSP               | 0.22           | U <sub>700</sub> , dT <sub>900-s</sub> , T <sub>850</sub> , V <sub>700</sub>                                                                      | 0.48           | U <sub>700</sub> , dT <sub>900-s</sub> , T <sub>850</sub> , V <sub>700</sub> , SO <sub>2</sub>                                 | 0.50           | SO <sub>2</sub> , OC      | 0.30           | T <sub>850</sub> , U <sub>700</sub> , V <sub>700</sub> , dT <sub>850-s</sub> , T <sub>500</sub>                                                        | 0.38           | SO <sub>2</sub> , T <sub>850</sub> , U <sub>700</sub> , V <sub>700</sub> , dT <sub>850-s</sub> , SM                                                                    | 0.65           | SO <sub>2</sub> , OC          | 0.41           | T <sub>850</sub> , WS <sub>850</sub>                                                                                    | 0.34           | SO <sub>2</sub> , T <sub>s</sub> , WS <sub>s</sub> , Pre                                                                                  | 0.61           |
| ME   | /                     | /              | SLP, VWS <sub>500-850</sub>                                                                                                                       | 0.66           | SLP, VWS <sub>500-850</sub>                                                                                                    | 0.66           | TSP, OC                   | 0.09           | SLP, T <sub>500</sub> , WS <sub>s</sub>                                                                                                                | 0.83           | SLP, TSP, U <sub>500</sub> , V <sub>500</sub> , RH <sub>500</sub>                                                                                                      | 0.89           | TSP                           | 0.04           | SLP, VWS <sub>500-850</sub>                                                                                             | 0.73           | SLP, VWS <sub>500-850</sub> , TSP                                                                                                         | 0.76           |
| WEU  | SO <sub>2</sub> , OC  | 0.28           | RH <sub>s</sub> , SM, VWS <sub>500-850</sub> , T <sub>700</sub> , Ome <sub>500</sub>                                                              | 0.39           | RH <sub>s</sub> , SO <sub>2</sub> , U <sub>500</sub> , OC, SM, dT <sub>850-s</sub> , Ome <sub>850</sub> , SLP, PBLH            | 0.57           | OC, TSP                   | 0.41           | WS <sub>s</sub> , SM, RH <sub>s</sub> , V <sub>700</sub> , VWS <sub>500-850</sub>                                                                      | 0.77           | WS <sub>s</sub> , SM, RH <sub>s</sub> , V <sub>700</sub> , VWS <sub>500-850</sub> , TSP, OC, SO <sub>2</sub> , RH <sub>500</sub> , Pre, OME <sub>500</sub>             | 0.84           | SO <sub>2</sub> , OC          | 0.46           | RH <sub>s</sub> , dT <sub>850-s</sub> , dT <sub>900-s</sub> , U <sub>500</sub>                                          | 0.50           | dT <sub>850-s</sub> , Ome <sub>500</sub> , U <sub>500</sub> , SLP, RH <sub>850</sub>                                                      | 0.69           |
| SD   | /                     | /              | WS <sub>s</sub> , U <sub>700</sub> , VWS <sub>500-850</sub> , CLF, Pre, Ome <sub>850</sub>                                                        | 0.31           | WS <sub>s</sub> , U <sub>700</sub> , VWS <sub>500-850</sub> , CLF, Pre, Ome <sub>850</sub>                                     | 0.31           | SO <sub>2</sub>           | 0.04           | WS <sub>s</sub> , T <sub>850</sub> , V <sub>700</sub> , U <sub>700</sub> , WS <sub>700</sub> , WS <sub>850</sub> , U <sub>850</sub> , V <sub>850</sub> | 0.74           | WS <sub>s</sub> , T <sub>850</sub> , V <sub>700</sub> , U <sub>700</sub> , WS <sub>700</sub> , WS <sub>850</sub> , U <sub>850</sub>                                    | 0.74           | SO <sub>2</sub>               | 0.01           | WS <sub>s</sub> , Ome <sub>700</sub> , U <sub>850</sub> , Pre, RH <sub>500</sub>                                        | 0.42           | WS <sub>s</sub> , Ome <sub>700</sub> , U <sub>850</sub> , Pre, RH <sub>500</sub>                                                          | 0.42           |
| CF   | BC                    | 0.57           | dT <sub>900-s</sub> , U <sub>850</sub> , SM, SLP                                                                                                  | 0.63           | BC, dT <sub>900-s</sub> , U <sub>850</sub> , SM                                                                                | 0.66           | TSP                       | 0.50           | Ome <sub>850</sub> , RH <sub>700</sub> , U <sub>700</sub> , PBLH                                                                                       | 0.79           | Ome <sub>850</sub> , SO <sub>2</sub> , SLP, Ome <sub>500</sub> , U <sub>850</sub>                                                                                      | 0.83           | TSP                           | 0.48           | RH <sub>s</sub> , U <sub>700</sub>                                                                                      | 0.53           | RH <sub>s</sub> , TSP, V <sub>850</sub> , T <sub>s</sub>                                                                                  | 0.60           |
| EUS  | OC, SO <sub>2</sub>   | 0.32           | WS <sub>500</sub> , RH <sub>500</sub>                                                                                                             | 0.42           | RH <sub>500</sub> , SO <sub>2</sub> , BC, WS <sub>850</sub>                                                                    | 0.50           | OC, TSP                   | 0.42           | PBLH, Ome <sub>850</sub> , V <sub>500</sub> , GH <sub>850</sub> , SM, WS <sub>s</sub> , dT <sub>900-s</sub> , RH <sub>500</sub>                        | 0.79           | PBLH, Ome <sub>850</sub> , V <sub>500</sub> , TSP, U <sub>500</sub> , CLF                                                                                              | 0.78           | SO <sub>2</sub> , OC          | 0.40           | dT <sub>850-s</sub> , RH <sub>500</sub> , U <sub>500</sub>                                                              | 0.51           | dT <sub>850-s</sub> , RH <sub>500</sub> , SO <sub>2</sub> , U <sub>500</sub> , PBLH, OME <sub>850</sub> , SM, WS <sub>s</sub>             | 0.66           |
| AMZ  | OC                    | 0.54           | SM, RH <sub>700</sub> , T <sub>500</sub> , T <sub>850</sub> , RH <sub>500</sub>                                                                   | 0.76           | SM, RH <sub>700</sub> , T <sub>500</sub> , T <sub>850</sub>                                                                    | 0.76           | BC                        | 0.42           | T <sub>850</sub> , GH <sub>500</sub> , WS <sub>s</sub> , Ome <sub>850</sub>                                                                            | 0.73           | T <sub>850</sub> , BC, GH <sub>500</sub>                                                                                                                               | 0.78           | OC                            | 0.44           | SM, Ome <sub>850</sub> , V <sub>850</sub>                                                                               | 0.66           | SM, Ome <sub>850</sub> , OC                                                                                                               | 0.68           |

**Table S3.** The LMG method for estimated relative importance (%) of the retained variables based on stepwise MLR model over the 12 ROIs during three different periods: 1980-1997, 1998-2014, and 1980-2014. Note that after implementing variable filtering based on stepwise MLR model, the number of explanatory variables retained for each ROI is different.

| ROIs | 1980-1997                                                                                                                                                                                           |                    | 1998-2014                                                                                                                                                                                                                                                    |                    | 1980-2014                                                                                                                                                                                                                |                    |
|------|-----------------------------------------------------------------------------------------------------------------------------------------------------------------------------------------------------|--------------------|--------------------------------------------------------------------------------------------------------------------------------------------------------------------------------------------------------------------------------------------------------------|--------------------|--------------------------------------------------------------------------------------------------------------------------------------------------------------------------------------------------------------------------|--------------------|
|      | Relative contribution of variables (%)                                                                                                                                                              | R <sup>2</sup> (%) | Relative contribution of variables (%)                                                                                                                                                                                                                       | R <sup>2</sup> (%) | Relative contribution of variables (%)                                                                                                                                                                                   | R <sup>2</sup> (%) |
| NEA  | dT <sub>850-s</sub> (19.3%), GH <sub>700</sub> (10.4%), Ome <sub>500</sub> (9.7%)                                                                                                                   | 39.4%              | RH <sub>850</sub> (31.9 %), CLF (7.2 %), GH <sub>850</sub> (12.3 %), TSP (2.7 %),<br>OME <sub>850</sub> (12.3 %), Ts (6.1 %)                                                                                                                                 | 72.4%              | GH <sub>500</sub> (14.1 %), PBLH (30.2 %), BC (7.4 %),<br>VWS <sub>500-850</sub> (5.8 %), Pre (2.6 %)                                                                                                                    | 60.0%              |
| NC   | WS <sub>850</sub> (12.3%), SM (10.9%), RH <sub>850</sub> (9.8%),<br>GH <sub>700</sub> (5.5%), SO <sub>2</sub> (5.1%)                                                                                | 43.6%              | SO <sub>2</sub> (9.7 %), GH <sub>700</sub> (5.0 %), Ome <sub>850</sub> (10.4 %), WS <sub>850</sub> (10.4 %), WS <sub>s</sub> (1.5 %), Pre<br>(4.0 %), BC (20.7 %), TSP (11.4 %), CLF (7.9 %)                                                                 | 81.0%              | SO <sub>2</sub> (24.9 %), BC (18.2 %), TSP (12.9 %), GH <sub>700</sub> (4.3 %), WS <sub>850</sub><br>(11.4 %), RH <sub>850</sub> (3.9 %), SM (0.8 %)                                                                     | 76.4%              |
| SC   | PBLH (6.1 %), Ome <sub>700</sub> (11.8 %), dT <sub>850-s</sub> (17.2 %), T <sub>500</sub> (16.7 %)                                                                                                  | 51.9%              | BC (5.5 %), Ome <sub>850</sub> (6.5 %), Pre (10.4 %), SO <sub>2</sub> (7.1 %), V <sub>700</sub> (4.2 %), WS <sub>700</sub><br>(22.9 %), RHs (1.3 %), V <sub>500</sub> (1.4 %), TSP (6.8 %), PBLH (10.4 %), V <sub>850</sub> (1.6 %)                          | 77.9%              | BC (9.9 %), PBLH (3.2 %), TSP (10.5 %), Ome <sub>850</sub> (6.8 %), T <sub>500</sub> (8.6 %),<br>SO <sub>2</sub> (15.2 %), Pre (4.6 %), V <sub>700</sub> (2.5 %), WS <sub>700</sub> (11.6 %)                             | 73.0%              |
| SEA  | BC (26.1 %), SM (9.5 %), U <sub>500</sub> (1.0 %), T <sub>s</sub> (5.2 %), WS <sub>500</sub> (1.5%),<br>V <sub>850</sub> (7.8 %), RH <sub>850</sub> (1.7 %), RH <sub>500</sub> (3.8 %), Pre (3.3 %) | 60.1%              | BC (33.1 %), RH <sub>500</sub> (11.8 %), SO <sub>2</sub> (7.3 %), WS <sub>500</sub> (2.0 %), U <sub>500</sub> (0.9 %), WS <sub>700</sub><br>(0.6 %), SM (10.0 %), T <sub>700</sub> (2.1 %), V <sub>500</sub> (6.5 %), WS <sub>850</sub> (0.6 %), Pre (5.3 %) | 80.0%              | BC (27.7 %), SM (11.7 %), T <sub>700</sub> (1.1 %), dT <sub>900-s</sub> (1.9 %), PBLH (1.9 %),<br>SO <sub>2</sub> (2.7 %), V <sub>500</sub> (1.1 %), dT <sub>850-s</sub> (1.1 %), GH <sub>500</sub> (1.2 %), Pre (4.4 %) | 54.8%              |
| NWC  | Ome <sub>500</sub> (15.7 %), U <sub>850</sub> (11.0 %), TSP (3.8 %), Pre (3.1 %),<br>V <sub>500</sub> (1.7 %), WS <sub>850</sub> (11.1 %), Ome <sub>700</sub> (8.9 %)                               | 55.2%              | WS <sub>s</sub> (12.3 %), BC (16.6 %), U <sub>700</sub> (10.2 %), TSP (2.0 %), PBLH (21.6 %), CLF<br>(3.8 %), RH <sub>700</sub> (1.3 %), OC (10.8 %), WS <sub>850</sub> (9.1 %)                                                                              | 87.6%              | V <sub>850</sub> (19.0 %), CLF (8.7 %), RH <sub>s</sub> (10.9 %), U <sub>850</sub> (6.8 %), V <sub>700</sub> (4.5 %),<br>dT <sub>850-s</sub> (11.7 %), BC (5.2 %)                                                        | 66.8%              |
| SA   | U <sub>700</sub> (6.4 %), dT <sub>900-s</sub> (3.7 %), T <sub>850</sub> (35.0 %),<br>V <sub>700</sub> (4.0 %), SO <sub>2</sub> (0.6 %)                                                              | 49.6%              | SO <sub>2</sub> (29.3 %), T <sub>850</sub> (15.1 %), U <sub>700</sub> (5.1 %), V <sub>700</sub> (6.3 %),<br>dT <sub>850-s</sub> (4.4 %), SM (4.6 %)                                                                                                          | 64.9%              | SO <sub>2</sub> (32.6 %), T <sub>s</sub> (15.9 %), WS <sub>s</sub> (9.7 %), Pre (3.1 %)                                                                                                                                  | 61.3%              |
| ME   | SLP (55.6 %), VWS <sub>500-850</sub> (10.8 %)                                                                                                                                                       | 66.4%              | SLP (38.7 %), TSP (5.0 %), U <sub>500</sub> (14.9 %), V <sub>500</sub> (5.1 %), RH <sub>500</sub> (24.7 %)                                                                                                                                                   | 88.5%              | SLP (60.9 %), VWS <sub>500-850</sub> (11.9 %), TSP (3.2 %)                                                                                                                                                               | 76.0%              |
| WEU  | RH <sub>s</sub> (11.9 %), SO <sub>2</sub> (12.7 %), U <sub>500</sub> (6.9 %), OC (7.2 %), SM (4.7 %),<br>dT <sub>850-s</sub> (5.3 %), Ome <sub>850</sub> (2.3 %), SLP (1.8 %), PBLH (4.4 %)         | 57.1%              | WS <sub>s</sub> (15.1 %), SM (6.4 %), RHs (20.0 %), V <sub>700</sub> (4.0 %), VWS <sub>500-850</sub> (0.9 %), TSP<br>(3.3 %), OC (11.2 %), SO <sub>2</sub> (1.4 %), RH <sub>500</sub> (3.9 %), Pre (14.8 %), OME <sub>500</sub> (3.4 %)                      | 84.4%              | SO <sub>2</sub> (21.7 %), RH <sub>s</sub> (14.1 %), SM (4.0 %), OC (5.1 %), dT <sub>850-s</sub> (8.7 %),<br>Ome <sub>500</sub> (2.1 %), U <sub>500</sub> (4.9 %), SLP (1.1 %), RH <sub>850</sub> (7.4 %)                 | 69.0%              |
| SD   | WS <sub>s</sub> (8.9 %), U <sub>700</sub> (8.8 %), VWS <sub>500-850</sub> (7.7 %),<br>CLF (1.4 %), Pre (2.1 %), Ome <sub>850</sub> (2.6 %)                                                          | 31.4%              | WSs (42.1 %), T <sub>850</sub> (13.1 %), V <sub>700</sub> (4.3 %), U <sub>700</sub> (6.2 %), WS <sub>700</sub> (2.3 %), WS <sub>850</sub><br>(4.5 %), U <sub>850</sub> (1.5 %)                                                                               | 74.0%              | WS <sub>s</sub> (27.4 %), Ome <sub>700</sub> (6.5 %), U <sub>850</sub> (2.4 %), Pre (3.1 %), RH <sub>500</sub> (2.9 %)                                                                                                   | 42.3%              |
| CF   | BC (26.1 %), dT <sub>900-s</sub> (21.0 %), U <sub>850</sub> (7.3%), SM (11.2 %)                                                                                                                     | 65.6%              | Ome <sub>850</sub> (29.9 %), SO <sub>2</sub> (25.1 %), SLP (8.4 %), Ome <sub>500</sub> (14.0 %), U <sub>850</sub> (5.3 %)                                                                                                                                    | 82.6%              | RH <sub>s</sub> (28.0 %), TSP (24.8 %), V <sub>850</sub> (5.1 %), T <sub>s</sub> (2.4 %)                                                                                                                                 | 60.3%              |
| EUS  | RH <sub>500</sub> (8.4 %), SO <sub>2</sub> (11.7 %), BC (9.7 %), WS <sub>850</sub> (20.5 %)                                                                                                         | 50.3%              | PBLH (22.5 %), Ome <sub>850</sub> (23.7 %), V <sub>500</sub> (7.4 %), TSP (1.2 %),<br>U <sub>500</sub> (17.7 %), CLF (5.6 %)                                                                                                                                 | 78.2%              | dT <sub>850-s</sub> (9.4 %), RH <sub>500</sub> (6.0 %), SO <sub>2</sub> (12.7 %), U <sub>500</sub> (10.0 %), PBLH<br>(8.5 %), OME <sub>850</sub> (7.5 %), SM (3.4 %), WS <sub>s</sub> (8.0 %)                            | 65.5%              |
| AMZ  | SM (44.8 %), RH <sub>700</sub> (3.9 %), T <sub>500</sub> (12.4 %), T <sub>850</sub> (14.5 %)                                                                                                        | 75.5%              | T <sub>850</sub> (46.4 %), BC (28.6 %), GH <sub>500</sub> (3.0 %)                                                                                                                                                                                            | 78.1%              | SM (35.5 %), Ome <sub>850</sub> (8.6 %), OC (24.0 %)                                                                                                                                                                     | 68.1%              |

**Table S4.** Location information from the selected 468 AERONET sites worldwide and results for the statistical comparison with three-hourly MERRA-2 AOD. R is (Pearson) correlation coefficient, MAE is the mean absolute error, RMSE is the root-mean-square error of the differences, RMB is the relative mean bias, MFE is the mean fractional error, FGE is the fractional gross error and IOA is the index of agreement.

| Site names          | Lat.    | Lon.   | Number of collocations | R    | MAE  | RMSE | RMB  | MFE (%) | FGE (%) | IOA  |
|---------------------|---------|--------|------------------------|------|------|------|------|---------|---------|------|
| Abracos_Hill        | -62.36  | -10.76 | 2025                   | 0.82 | 0.11 | 0.23 | 0.82 | 33.29   | -12.67  | 0.89 |
| AgiaMarina_Xyliatou | 33.06   | 35.04  | 1238                   | 0.79 | 0.04 | 0.06 | 1.10 | 35.07   | 17.89   | 0.97 |
| Agoufou             | -1.48   | 15.35  | 5584                   | 0.77 | 0.16 | 0.23 | 0.96 | 35.23   | 7.05    | 0.88 |
| Alta_Floresta       | -56.10  | -9.87  | 6448                   | 0.77 | 0.13 | 0.29 | 0.78 | 37.86   | -6.69   | 0.83 |
| Amazon_ATTO_Tower   | -59.00  | -2.14  | 378                    | 0.69 | 0.05 | 0.08 | 0.97 | 30.94   | -6.22   | 0.96 |
| American_Samoa      | -170.56 | -14.25 | 386                    | 0.41 | 0.03 | 0.04 | 0.94 | 35.66   | -2.74   | 0.97 |
| Ames                | -93.77  | 42.02  | 3313                   | 0.67 | 0.07 | 0.11 | 1.02 | 44.26   | 4.76    | 0.93 |
| Amsterdam_Island    | 77.57   | -37.80 | 1323                   | 0.31 | 0.04 | 0.09 | 0.77 | 40.83   | -4.69   | 0.91 |
| Andenes             | 16.01   | 69.28  | 1558                   | 0.69 | 0.02 | 0.04 | 1.06 | 31.03   | 8.98    | 0.98 |
| Anmyon              | 126.33  | 36.54  | 3179                   | 0.82 | 0.11 | 0.18 | 0.96 | 31.09   | 1.07    | 0.93 |
| Appalachian_State   | -81.69  | 36.21  | 2599                   | 0.70 | 0.05 | 0.07 | 1.26 | 45.25   | 30.03   | 0.96 |
| Appledore_Island    | -70.62  | 42.99  | 767                    | 0.63 | 0.06 | 0.10 | 1.28 | 40.91   | 25.74   | 0.93 |
| Aras_de_los_Olmos   | -1.10   | 39.95  | 585                    | 0.84 | 0.03 | 0.04 | 0.98 | 43.32   | 18.12   | 0.98 |
| Arcachon            | -1.16   | 44.66  | 3085                   | 0.72 | 0.04 | 0.06 | 1.06 | 31.67   | 9.46    | 0.97 |
| Arica               | -70.31  | -18.47 | 7582                   | 0.55 | 0.07 | 0.10 | 0.89 | 33.33   | -11.84  | 0.94 |
| ARM_Darwin          | 130.89  | -12.43 | 2237                   | 0.74 | 0.04 | 0.06 | 1.04 | 31.64   | 8.97    | 0.97 |
| ARM_Graciosa        | -28.03  | 39.09  | 945                    | 0.61 | 0.03 | 0.04 | 1.14 | 36.06   | 15.79   | 0.97 |
| Ascension_Island    | -14.41  | -7.98  | 5525                   | 0.79 | 0.04 | 0.06 | 1.05 | 27.45   | 8.30    | 0.97 |
| ATHENS-NOA          | 23.72   | 37.97  | 4227                   | 0.74 | 0.05 | 0.07 | 0.96 | 29.17   | -1.00   | 0.97 |
| Aubiere_LAMP        | 3.11    | 45.76  | 2533                   | 0.72 | 0.04 | 0.06 | 0.90 | 37.98   | -4.43   | 0.97 |
| Autilla             | -4.60   | 42.00  | 3889                   | 0.75 | 0.03 | 0.04 | 1.10 | 35.95   | 13.71   | 0.98 |

|                 |         |        |       |      |      |      |      |       |        |      |
|-----------------|---------|--------|-------|------|------|------|------|-------|--------|------|
| Avignon         | 4.88    | 43.93  | 7355  | 0.78 | 0.04 | 0.06 | 0.89 | 32.38 | -9.52  | 0.97 |
| Azores          | -28.63  | 38.53  | 631   | 0.66 | 0.03 | 0.05 | 1.03 | 34.47 | 9.37   | 0.97 |
| Bac_Giang       | 106.23  | 21.29  | 1571  | 0.87 | 0.15 | 0.24 | 0.84 | 23.12 | -15.12 | 0.91 |
| Bac_Lieu        | 105.73  | 9.28   | 2088  | 0.66 | 0.08 | 0.16 | 0.90 | 28.84 | -0.38  | 0.90 |
| Badajoz         | -7.01   | 38.88  | 1429  | 0.80 | 0.03 | 0.05 | 1.01 | 36.36 | 9.42   | 0.97 |
| Baengnyeong     | 124.63  | 37.97  | 1777  | 0.82 | 0.09 | 0.16 | 1.08 | 29.78 | 12.03  | 0.93 |
| Bahrain         | 50.61   | 26.21  | 2769  | 0.93 | 0.04 | 0.07 | 1.05 | 14.45 | 6.20   | 0.98 |
| Bakersfield     | -119.00 | 35.33  | 1445  | 0.48 | 0.05 | 0.08 | 0.76 | 43.97 | -27.55 | 0.94 |
| Balbina         | -59.49  | -1.92  | 813   | 0.73 | 0.05 | 0.07 | 0.87 | 32.37 | -11.68 | 0.96 |
| Bandung         | 107.61  | -6.89  | 2004  | 0.47 | 0.18 | 0.28 | 0.73 | 47.64 | -20.53 | 0.78 |
| Banizoumbou     | 2.67    | 13.55  | 13742 | 0.76 | 0.15 | 0.22 | 1.02 | 34.56 | 10.18  | 0.89 |
| Barbados        | -59.62  | 13.15  | 862   | 0.63 | 0.07 | 0.10 | 0.88 | 42.64 | -0.27  | 0.93 |
| Barcelona       | 2.11    | 41.39  | 6744  | 0.75 | 0.05 | 0.07 | 0.88 | 33.78 | -8.06  | 0.97 |
| Bari_University | 16.88   | 41.11  | 1079  | 0.87 | 0.03 | 0.05 | 0.96 | 19.18 | -2.82  | 0.98 |
| Barrow          | -156.66 | 71.31  | 1656  | 0.56 | 0.06 | 0.10 | 1.19 | 49.16 | 29.64  | 0.92 |
| Bayfordbury     | -0.10   | 51.78  | 803   | 0.70 | 0.04 | 0.06 | 1.02 | 33.79 | 8.11   | 0.96 |
| Beijing         | 116.38  | 39.98  | 7528  | 0.78 | 0.28 | 0.46 | 0.64 | 51.34 | -34.02 | 0.73 |
| Beijing-CAMS    | 116.32  | 39.93  | 2273  | 0.76 | 0.26 | 0.43 | 0.67 | 51.07 | -26.97 | 0.75 |
| Belsk           | 20.79   | 51.84  | 5120  | 0.84 | 0.04 | 0.07 | 0.94 | 23.75 | -4.95  | 0.97 |
| Belterra        | -54.95  | -2.65  | 1026  | 0.72 | 0.07 | 0.11 | 0.74 | 35.87 | -25.13 | 0.93 |
| Ben_Salem       | 9.91    | 35.55  | 2783  | 0.82 | 0.05 | 0.09 | 1.06 | 31.38 | 9.39   | 0.96 |
| Bermuda         | -64.70  | 32.37  | 1774  | 0.58 | 0.04 | 0.06 | 0.97 | 36.66 | 3.76   | 0.96 |
| Bethlehem       | 28.33   | -28.25 | 933   | 0.84 | 0.03 | 0.05 | 0.89 | 30.84 | -5.77  | 0.98 |
| Bhola           | 90.76   | 22.23  | 1316  | 0.80 | 0.15 | 0.21 | 0.86 | 27.62 | -13.26 | 0.91 |
| Bidi_Bahn       | -2.45   | 14.06  | 852   | 0.56 | 0.22 | 0.31 | 0.84 | 47.30 | -0.17  | 0.75 |
| Billerica       | -71.27  | 42.53  | 5446  | 0.65 | 0.06 | 0.10 | 1.29 | 47.20 | 31.17  | 0.94 |

|                     |         |        |      |      |      |      |      |       |        |      |
|---------------------|---------|--------|------|------|------|------|------|-------|--------|------|
| Birdsville          | 139.35  | -25.90 | 6117 | 0.62 | 0.04 | 0.06 | 1.94 | 71.07 | 68.67  | 0.95 |
| Birkenes            | 8.25    | 58.39  | 1855 | 0.78 | 0.03 | 0.04 | 1.07 | 29.81 | 10.39  | 0.98 |
| Blida               | 2.88    | 36.51  | 3715 | 0.86 | 0.06 | 0.09 | 0.81 | 31.70 | -19.57 | 0.96 |
| Bonanza             | 19.59   | -21.83 | 873  | 0.88 | 0.04 | 0.05 | 1.03 | 39.11 | 16.00  | 0.98 |
| Bonanza_Creek       | -148.32 | 64.74  | 3914 | 0.76 | 0.09 | 0.18 | 1.13 | 51.07 | 27.73  | 0.86 |
| BONDVILLE           | -88.37  | 40.05  | 7131 | 0.64 | 0.07 | 0.11 | 1.07 | 41.76 | 10.73  | 0.94 |
| BORDEAUX            | -0.58   | 44.79  | 775  | 0.78 | 0.05 | 0.07 | 0.87 | 30.81 | -13.59 | 0.97 |
| Bozeman             | -111.05 | 45.66  | 4255 | 0.64 | 0.04 | 0.08 | 1.16 | 44.20 | 20.74  | 0.94 |
| Bratts_Lake         | -104.71 | 50.20  | 6157 | 0.57 | 0.05 | 0.08 | 1.19 | 42.92 | 21.47  | 0.94 |
| Brisbane-Uni_of_QLD | 153.01  | -27.50 | 1127 | 0.72 | 0.03 | 0.05 | 1.21 | 42.63 | 29.03  | 0.97 |
| Brookhaven          | -72.88  | 40.87  | 1291 | 0.63 | 0.08 | 0.13 | 1.23 | 48.99 | 27.99  | 0.92 |
| Brussels            | 4.35    | 50.78  | 2400 | 0.77 | 0.05 | 0.08 | 0.90 | 28.59 | -7.07  | 0.96 |
| BSRN_BAO_Boulder    | -105.01 | 40.05  | 7655 | 0.57 | 0.04 | 0.06 | 1.10 | 41.39 | 14.33  | 0.96 |
| Bucharest_Inoe      | 26.03   | 44.35  | 2898 | 0.81 | 0.05 | 0.07 | 0.94 | 25.75 | -6.20  | 0.97 |
| Bujumbura           | 29.38   | -3.38  | 1018 | 0.73 | 0.27 | 0.32 | 0.42 | 83.98 | -82.98 | 0.68 |
| Bure_OPE            | 5.51    | 48.56  | 1345 | 0.72 | 0.04 | 0.05 | 1.02 | 34.56 | 6.69   | 0.97 |
| Burjassot           | -0.42   | 39.51  | 6029 | 0.82 | 0.04 | 0.06 | 0.89 | 29.04 | -5.72  | 0.97 |
| Cabauw              | 4.93    | 51.97  | 3287 | 0.65 | 0.07 | 0.11 | 0.78 | 38.51 | -19.10 | 0.92 |
| Cabo_da_Roca        | -9.50   | 38.78  | 4129 | 0.84 | 0.04 | 0.06 | 1.09 | 34.73 | 15.50  | 0.97 |
| Caceres             | -6.34   | 39.48  | 3946 | 0.83 | 0.03 | 0.04 | 1.03 | 25.53 | 7.12   | 0.98 |
| Cairo_EMA_2         | 31.29   | 30.08  | 5324 | 0.53 | 0.13 | 0.19 | 0.71 | 44.39 | -33.38 | 0.84 |
| Calern_OCA          | 6.92    | 43.75  | 946  | 0.83 | 0.03 | 0.04 | 1.07 | 29.77 | 12.63  | 0.98 |
| Calhau              | -24.87  | 16.86  | 868  | 0.88 | 0.06 | 0.10 | 0.91 | 25.35 | -6.29  | 0.97 |
| CalTech             | -118.13 | 34.14  | 2521 | 0.56 | 0.04 | 0.06 | 0.89 | 43.42 | 0.58   | 0.96 |
| Camaguey            | -77.85  | 21.42  | 2510 | 0.68 | 0.04 | 0.06 | 1.06 | 31.30 | 8.57   | 0.97 |
| Campo_Grande_SONDA  | -54.54  | -20.44 | 3125 | 0.91 | 0.04 | 0.09 | 0.99 | 33.13 | 10.67  | 0.96 |

|                    |         |        |      |      |      |      |      |       |        |      |
|--------------------|---------|--------|------|------|------|------|------|-------|--------|------|
| Canberra           | 149.11  | -35.27 | 7434 | 0.72 | 0.03 | 0.04 | 1.14 | 39.79 | 18.92  | 0.97 |
| Cape_San_Juan      | -65.62  | 18.38  | 3306 | 0.82 | 0.05 | 0.07 | 1.03 | 33.59 | 8.93   | 0.97 |
| Capo_Verde         | -22.94  | 16.73  | 9163 | 0.85 | 0.08 | 0.13 | 0.94 | 27.82 | -2.29  | 0.95 |
| Carpentras         | 5.06    | 44.08  | 9152 | 0.82 | 0.03 | 0.05 | 0.97 | 30.62 | 2.11   | 0.98 |
| CARTEL             | -71.93  | 45.38  | 5316 | 0.57 | 0.05 | 0.09 | 1.11 | 40.80 | 12.18  | 0.94 |
| CASLEO             | -69.30  | -31.80 | 3027 | 0.44 | 0.03 | 0.04 | 2.08 | 64.72 | 58.94  | 0.95 |
| CCNY               | -73.95  | 40.82  | 4445 | 0.71 | 0.07 | 0.11 | 1.10 | 41.46 | 15.47  | 0.94 |
| CEILAP-BA          | -58.51  | -34.56 | 7410 | 0.58 | 0.05 | 0.07 | 1.17 | 44.19 | 19.73  | 0.94 |
| CEILAP-Bariloche   | -71.16  | -41.15 | 1212 | 0.56 | 0.02 | 0.03 | 1.33 | 39.95 | 22.71  | 0.98 |
| CEILAP-Comodoro    | -67.46  | -45.79 | 1879 | 0.35 | 0.03 | 0.04 | 1.73 | 62.43 | 52.49  | 0.96 |
| CEILAP-Neuquen     | -68.14  | -38.95 | 1741 | 0.54 | 0.04 | 0.06 | 1.62 | 56.21 | 42.64  | 0.95 |
| CEILAP-RG          | -69.32  | -51.60 | 2860 | 0.20 | 0.03 | 0.04 | 2.02 | 68.95 | 63.42  | 0.95 |
| CENER              | -1.60   | 42.82  | 1781 | 0.69 | 0.04 | 0.06 | 0.97 | 38.71 | 3.73   | 0.97 |
| Cerro_Poyos        | -3.49   | 37.11  | 1937 | 0.83 | 0.05 | 0.06 | 1.33 | 52.62 | 42.82  | 0.97 |
| Chapais            | -74.98  | 49.82  | 2696 | 0.62 | 0.05 | 0.08 | 1.26 | 46.65 | 27.80  | 0.94 |
| Chen-Kung_Univ     | 120.20  | 22.99  | 3705 | 0.72 | 0.17 | 0.26 | 0.79 | 38.17 | -16.42 | 0.86 |
| Chequamegon        | -90.25  | 45.93  | 996  | 0.55 | 0.05 | 0.09 | 1.08 | 48.62 | 16.52  | 0.94 |
| Chiang_Mai_Met_Sta | 98.97   | 18.77  | 4817 | 0.89 | 0.14 | 0.20 | 0.76 | 37.44 | -28.96 | 0.92 |
| Chiayi             | 120.50  | 23.50  | 1191 | 0.51 | 0.29 | 0.40 | 0.57 | 58.33 | -47.57 | 0.64 |
| Chiba_University   | 140.10  | 35.62  | 927  | 0.72 | 0.06 | 0.09 | 1.25 | 40.81 | 27.29  | 0.95 |
| Chilbolton         | -1.44   | 51.14  | 2930 | 0.79 | 0.04 | 0.07 | 0.95 | 29.54 | 0.04   | 0.97 |
| Churchill          | -93.82  | 58.74  | 2367 | 0.60 | 0.06 | 0.13 | 1.19 | 45.36 | 25.90  | 0.89 |
| CLUJ_UBB           | 23.55   | 46.77  | 2240 | 0.73 | 0.05 | 0.08 | 0.80 | 35.12 | -21.81 | 0.96 |
| Coconut_Island     | -157.79 | 21.43  | 969  | 0.40 | 0.03 | 0.04 | 1.15 | 39.78 | 19.64  | 0.97 |
| Columbia_SC        | -81.04  | 34.02  | 1041 | 0.82 | 0.07 | 0.11 | 0.93 | 35.12 | -0.04  | 0.95 |
| Cordoba-CETT       | -64.46  | -31.52 | 4182 | 0.63 | 0.04 | 0.06 | 1.09 | 37.62 | 13.49  | 0.96 |



|                  |         |        |       |      |      |      |      |       |        |      |
|------------------|---------|--------|-------|------|------|------|------|-------|--------|------|
| Coruna           | -8.42   | 43.36  | 2159  | 0.66 | 0.04 | 0.06 | 0.86 | 34.14 | -10.30 | 0.96 |
| COVE             | -75.71  | 36.90  | 3591  | 0.76 | 0.07 | 0.12 | 1.08 | 39.35 | 16.77  | 0.94 |
| Crozet_Island    | 51.85   | -46.43 | 500   | 0.30 | 0.04 | 0.06 | 0.96 | 47.02 | 9.48   | 0.95 |
| CRPSM_Malindi    | 40.19   | -3.00  | 2150  | 0.71 | 0.05 | 0.08 | 0.84 | 28.54 | -14.45 | 0.96 |
| CUIABA-MIRANDA   | -56.07  | -15.73 | 4919  | 0.87 | 0.08 | 0.16 | 0.83 | 35.96 | -7.11  | 0.93 |
| CUT-TEPAK        | 33.04   | 34.67  | 2385  | 0.84 | 0.04 | 0.06 | 0.94 | 23.81 | -4.42  | 0.98 |
| Dahkla           | -15.95  | 23.72  | 1842  | 0.89 | 0.08 | 0.13 | 1.10 | 29.40 | 12.07  | 0.96 |
| Dakar            | -16.96  | 14.39  | 10684 | 0.83 | 0.10 | 0.15 | 1.00 | 25.57 | 2.52   | 0.94 |
| Dalanzadgad      | 104.42  | 43.58  | 7371  | 0.84 | 0.03 | 0.05 | 1.13 | 34.45 | 16.57  | 0.97 |
| Darwin           | 130.89  | -12.42 | 1581  | 0.78 | 0.04 | 0.06 | 1.05 | 29.02 | 10.09  | 0.97 |
| Davos            | 9.84    | 46.81  | 3457  | 0.79 | 0.03 | 0.04 | 1.20 | 39.07 | 25.46  | 0.98 |
| Dayton           | -84.11  | 39.78  | 1530  | 0.60 | 0.06 | 0.09 | 1.22 | 43.39 | 20.30  | 0.94 |
| Denver_LaCasa    | -105.01 | 39.78  | 1126  | 0.63 | 0.03 | 0.05 | 1.02 | 40.99 | 5.37   | 0.97 |
| Dhabi            | 54.38   | 24.48  | 2182  | 0.97 | 0.04 | 0.06 | 1.00 | 11.02 | 0.93   | 0.99 |
| Dhadnah          | 56.32   | 25.51  | 3958  | 0.97 | 0.03 | 0.05 | 1.01 | 10.63 | 3.00   | 0.99 |
| Dhaka_University | 90.40   | 23.73  | 1644  | 0.70 | 0.28 | 0.38 | 0.69 | 39.80 | -34.16 | 0.73 |
| Djougou          | 1.60    | 9.76   | 1736  | 0.79 | 0.18 | 0.26 | 0.86 | 32.62 | -20.32 | 0.88 |
| DMN_Maine_Soroa  | 12.02   | 13.22  | 2808  | 0.69 | 0.18 | 0.25 | 1.12 | 39.83 | 20.48  | 0.86 |
| Dongsha_Island   | 116.73  | 20.70  | 1215  | 0.90 | 0.06 | 0.09 | 0.94 | 25.07 | -0.07  | 0.97 |
| Dry_Tortugas     | -82.87  | 24.63  | 2820  | 0.58 | 0.04 | 0.06 | 1.01 | 35.42 | 7.35   | 0.96 |
| Dunedin          | 170.51  | -45.86 | 723   | 0.49 | 0.03 | 0.04 | 1.39 | 47.01 | 32.47  | 0.97 |
| Dunkerque        | 2.37    | 51.04  | 3358  | 0.74 | 0.05 | 0.09 | 0.91 | 31.71 | -5.42  | 0.95 |
| Durban_UKZN      | 30.94   | -29.82 | 445   | 0.89 | 0.05 | 0.07 | 0.79 | 33.06 | -20.08 | 0.97 |
| Dushanbe         | 68.86   | 38.55  | 3406  | 0.79 | 0.07 | 0.11 | 0.83 | 29.94 | -16.62 | 0.94 |
| Easton_Airport   | -76.07  | 38.81  | 1259  | 0.67 | 0.06 | 0.10 | 1.17 | 37.25 | 19.13  | 0.94 |
| Easton-MDE       | -76.08  | 38.79  | 920   | 0.59 | 0.06 | 0.09 | 1.46 | 54.75 | 42.15  | 0.94 |

|                     |         |        |      |      |      |      |      |       |        |      |
|---------------------|---------|--------|------|------|------|------|------|-------|--------|------|
| Edinburgh           | -3.18   | 55.92  | 504  | 0.62 | 0.04 | 0.05 | 1.16 | 39.09 | 18.58  | 0.96 |
| Eforie              | 28.63   | 44.08  | 2230 | 0.85 | 0.03 | 0.05 | 0.96 | 20.12 | -2.67  | 0.98 |
| Egbert              | -79.78  | 44.23  | 6532 | 0.61 | 0.06 | 0.10 | 1.15 | 44.07 | 19.93  | 0.94 |
| Eilat               | 34.92   | 29.50  | 4856 | 0.91 | 0.03 | 0.06 | 0.99 | 19.70 | 0.96   | 0.98 |
| El_Arenosillo       | -6.73   | 37.11  | 7755 | 0.83 | 0.04 | 0.06 | 0.98 | 29.64 | 2.50   | 0.98 |
| El_Farafra          | 27.99   | 27.06  | 3010 | 0.80 | 0.09 | 0.12 | 1.45 | 54.19 | 47.27  | 0.93 |
| El_Segundo          | -118.38 | 33.91  | 2936 | 0.56 | 0.04 | 0.05 | 0.98 | 37.41 | 5.26   | 0.97 |
| EPA-NCU             | 121.19  | 24.97  | 2171 | 0.67 | 0.14 | 0.22 | 0.82 | 40.66 | -10.35 | 0.86 |
| EPA-Res_Triangle_Pk | -78.87  | 35.88  | 1453 | 0.63 | 0.05 | 0.08 | 1.10 | 42.47 | 14.09  | 0.96 |
| Ersa                | 9.36    | 43.00  | 4774 | 0.78 | 0.04 | 0.06 | 1.15 | 32.43 | 18.04  | 0.97 |
| ETNA                | 15.02   | 37.61  | 2837 | 0.81 | 0.05 | 0.07 | 0.95 | 34.00 | 1.41   | 0.97 |
| EVK2-CNR            | 86.81   | 27.96  | 1715 | 0.76 | 0.03 | 0.04 | 1.79 | 62.90 | 58.46  | 0.97 |
| Evora               | -7.91   | 38.57  | 8392 | 0.81 | 0.03 | 0.05 | 1.05 | 32.90 | 12.57  | 0.98 |
| Fontainebleau       | 2.68    | 48.41  | 1846 | 0.80 | 0.04 | 0.07 | 0.96 | 24.76 | -1.83  | 0.97 |
| Fort_McKay          | -111.64 | 57.18  | 1131 | 0.59 | 0.10 | 0.22 | 1.37 | 53.68 | 24.50  | 0.79 |
| Fort_McMurray       | -111.48 | 56.75  | 3631 | 0.65 | 0.07 | 0.15 | 1.22 | 47.28 | 24.89  | 0.88 |
| FORTH_CRETE         | 25.28   | 35.33  | 6461 | 0.87 | 0.03 | 0.05 | 0.97 | 20.71 | -0.99  | 0.98 |
| Fowlers_Gap         | 141.70  | -31.09 | 2310 | 0.52 | 0.03 | 0.04 | 1.83 | 66.02 | 61.32  | 0.95 |
| Frenchman_Flat      | -115.93 | 36.81  | 4114 | 0.66 | 0.03 | 0.04 | 1.35 | 45.08 | 34.62  | 0.97 |
| Fresno              | -119.77 | 36.78  | 4824 | 0.39 | 0.05 | 0.08 | 0.78 | 40.61 | -17.57 | 0.94 |
| Fresno_2            | -119.77 | 36.79  | 2713 | 0.50 | 0.04 | 0.07 | 0.89 | 40.15 | -10.16 | 0.94 |
| Frioul              | 5.29    | 43.27  | 3306 | 0.81 | 0.03 | 0.05 | 1.17 | 33.11 | 21.03  | 0.98 |
| Fukuoka             | 130.48  | 33.52  | 1951 | 0.71 | 0.09 | 0.14 | 0.89 | 34.16 | -8.67  | 0.92 |
| FZJ-JOYCE           | 6.41    | 50.91  | 1355 | 0.68 | 0.05 | 0.08 | 0.87 | 32.45 | -7.21  | 0.96 |
| Gandhi_College      | 84.13   | 25.87  | 3393 | 0.82 | 0.11 | 0.16 | 0.97 | 19.15 | -2.35  | 0.94 |
| Gangneung_WNU       | 128.87  | 37.77  | 1953 | 0.76 | 0.09 | 0.14 | 0.90 | 38.10 | -11.35 | 0.93 |

|                     |         |        |       |      |      |      |      |       |        |      |
|---------------------|---------|--------|-------|------|------|------|------|-------|--------|------|
| Georgia_Tech        | -84.40  | 33.78  | 2414  | 0.71 | 0.05 | 0.07 | 1.10 | 36.99 | 14.23  | 0.96 |
| GISS                | -73.96  | 40.80  | 855   | 0.69 | 0.10 | 0.16 | 1.03 | 47.31 | 12.30  | 0.91 |
| Gobabeb             | 15.04   | -23.56 | 2502  | 0.81 | 0.06 | 0.07 | 1.47 | 55.58 | 49.39  | 0.95 |
| Goldstone           | -116.79 | 35.23  | 4739  | 0.68 | 0.04 | 0.05 | 1.61 | 58.14 | 53.33  | 0.96 |
| Gosan_SNU           | 126.16  | 33.29  | 2421  | 0.80 | 0.09 | 0.15 | 0.98 | 26.42 | 2.81   | 0.94 |
| Gotland             | 18.95   | 57.92  | 1110  | 0.91 | 0.03 | 0.05 | 1.05 | 25.73 | 10.67  | 0.98 |
| Gozo                | 14.26   | 36.03  | 766   | 0.82 | 0.05 | 0.08 | 1.14 | 32.03 | 15.67  | 0.96 |
| Granada             | -3.61   | 37.16  | 6670  | 0.85 | 0.04 | 0.06 | 0.92 | 28.51 | -7.78  | 0.98 |
| Grand_Forks         | -97.33  | 47.91  | 1191  | 0.73 | 0.06 | 0.11 | 1.20 | 47.32 | 23.44  | 0.92 |
| GSFC                | -76.84  | 38.99  | 12429 | 0.67 | 0.08 | 0.13 | 1.08 | 42.38 | 16.97  | 0.92 |
| Guadeloup           | -61.53  | 16.22  | 3881  | 0.82 | 0.05 | 0.08 | 1.04 | 38.49 | 12.54  | 0.97 |
| Gual_Pahari         | 77.15   | 28.43  | 910   | 0.76 | 0.11 | 0.18 | 0.95 | 19.10 | -3.83  | 0.92 |
| Gwangju_GIST        | 126.84  | 35.23  | 3905  | 0.79 | 0.12 | 0.19 | 0.89 | 31.88 | -10.27 | 0.91 |
| Hada_El-Sham        | 39.73   | 21.80  | 992   | 0.81 | 0.08 | 0.12 | 0.96 | 28.32 | 3.98   | 0.95 |
| Halifax             | -63.59  | 44.64  | 5459  | 0.63 | 0.05 | 0.08 | 1.26 | 40.26 | 24.58  | 0.94 |
| Hamburg             | 9.97    | 53.57  | 3763  | 0.80 | 0.04 | 0.07 | 0.94 | 27.03 | -2.38  | 0.97 |
| Hamim               | 54.30   | 22.97  | 2214  | 0.98 | 0.03 | 0.04 | 1.05 | 9.64  | 6.42   | 0.99 |
| Hankuk_UFS          | 127.27  | 37.34  | 1056  | 0.75 | 0.14 | 0.22 | 0.75 | 43.36 | -25.50 | 0.88 |
| Harvard_Forest      | -72.19  | 42.53  | 3315  | 0.63 | 0.06 | 0.09 | 1.30 | 45.55 | 29.51  | 0.94 |
| Helgoland           | 7.89    | 54.18  | 2101  | 0.74 | 0.04 | 0.07 | 0.99 | 28.13 | 3.24   | 0.96 |
| Helsinki            | 24.96   | 60.20  | 2034  | 0.86 | 0.03 | 0.04 | 1.12 | 27.26 | 15.21  | 0.98 |
| Henties_Bay         | 14.26   | -22.10 | 709   | 0.78 | 0.04 | 0.06 | 1.13 | 34.85 | 18.70  | 0.97 |
| Hermosillo          | -110.96 | 29.07  | 1606  | 0.74 | 0.03 | 0.04 | 1.15 | 30.95 | 14.01  | 0.98 |
| HESS                | 16.50   | -23.27 | 1187  | 0.80 | 0.03 | 0.05 | 1.22 | 52.03 | 38.80  | 0.97 |
| HJAndrews           | -122.22 | 44.24  | 4650  | 0.63 | 0.04 | 0.05 | 1.39 | 54.80 | 43.28  | 0.96 |
| HohenpeissenbergDWD | 11.01   | 47.80  | 1361  | 0.72 | 0.04 | 0.05 | 1.02 | 41.28 | 13.24  | 0.97 |

|                     |        |        |       |      |      |      |      |        |        |      |
|---------------------|--------|--------|-------|------|------|------|------|--------|--------|------|
| Hokkaido_University | 141.34 | 43.08  | 559   | 0.79 | 0.07 | 0.12 | 1.14 | 37.77  | 11.39  | 0.94 |
| Hong_Kong_PolyU     | 114.18 | 22.30  | 2401  | 0.84 | 0.10 | 0.15 | 1.03 | 24.56  | 7.94   | 0.94 |
| Hornsund            | 15.54  | 77.00  | 1584  | 0.69 | 0.02 | 0.05 | 0.97 | 26.33  | -1.41  | 0.97 |
| Howland             | -68.74 | 45.20  | 2690  | 0.61 | 0.05 | 0.09 | 1.18 | 42.86  | 20.09  | 0.94 |
| Huancayo-IGP        | -75.32 | -12.04 | 1546  | 0.22 | 0.07 | 0.10 | 1.47 | 60.17  | 26.70  | 0.90 |
| Huelva              | -6.57  | 37.02  | 3592  | 0.81 | 0.04 | 0.06 | 1.06 | 35.09  | 14.36  | 0.97 |
| Hyytiala            | 24.30  | 61.85  | 1749  | 0.83 | 0.02 | 0.04 | 1.01 | 25.49  | 3.63   | 0.98 |
| IASBS               | 48.51  | 36.71  | 2848  | 0.78 | 0.06 | 0.08 | 1.10 | 33.85  | 12.33  | 0.97 |
| Iasi_LOASL          | 27.56  | 47.19  | 2081  | 0.77 | 0.05 | 0.07 | 0.91 | 28.75  | -7.69  | 0.97 |
| ICIPE-Mbita         | 34.21  | -0.43  | 3240  | 0.75 | 0.07 | 0.10 | 0.73 | 40.66  | -30.85 | 0.94 |
| IER_Cinzana         | -5.93  | 13.28  | 8393  | 0.80 | 0.12 | 0.18 | 0.89 | 30.39  | -7.70  | 0.92 |
| Ilorin              | 4.67   | 8.48   | 5986  | 0.89 | 0.15 | 0.22 | 0.91 | 24.57  | -10.75 | 0.93 |
| IMAA_Potenza        | 15.72  | 40.60  | 3701  | 0.80 | 0.04 | 0.05 | 1.00 | 29.23  | 5.55   | 0.98 |
| IMC_Oristano        | 8.50   | 39.91  | 2223  | 0.83 | 0.05 | 0.07 | 0.88 | 29.44  | -7.87  | 0.97 |
| IMPROVE-MammothCave | -86.15 | 37.13  | 1543  | 0.63 | 0.06 | 0.08 | 1.11 | 43.08  | 14.76  | 0.95 |
| IMS-METU-ERDEMLI    | 34.26  | 36.56  | 7585  | 0.79 | 0.06 | 0.10 | 0.79 | 29.55  | -19.43 | 0.95 |
| Iqaluit             | -68.54 | 63.75  | 1142  | 0.66 | 0.04 | 0.06 | 1.23 | 42.35  | 28.13  | 0.96 |
| Irkutsk             | 103.09 | 51.80  | 1977  | 0.80 | 0.05 | 0.09 | 0.78 | 35.18  | -19.95 | 0.95 |
| ISDGM_CNR           | 12.33  | 45.44  | 2075  | 0.80 | 0.07 | 0.12 | 0.95 | 27.44  | 0.73   | 0.95 |
| Ispra               | 8.63   | 45.80  | 5941  | 0.72 | 0.11 | 0.19 | 0.71 | 41.74  | -21.16 | 0.88 |
| Issyk-Kul           | 76.98  | 42.62  | 4633  | 0.85 | 0.03 | 0.05 | 1.01 | 30.74  | 1.98   | 0.98 |
| Itajuba             | -45.45 | -22.41 | 891   | 0.68 | 0.04 | 0.06 | 0.88 | 42.26  | -5.71  | 0.96 |
| Ittoqqortoormiit    | -21.95 | 70.48  | 1590  | 0.60 | 0.03 | 0.04 | 1.26 | 40.46  | 27.89  | 0.97 |
| Izana               | -16.50 | 28.31  | 10711 | 0.81 | 0.08 | 0.10 | 2.41 | 111.15 | 109.03 | 0.92 |
| Jabiru              | 132.89 | -12.66 | 6684  | 0.77 | 0.05 | 0.07 | 1.16 | 36.31  | 22.80  | 0.97 |
| Jaipur              | 75.81  | 26.91  | 4417  | 0.84 | 0.09 | 0.13 | 0.89 | 23.36  | -14.08 | 0.95 |

|                   |         |        |      |      |      |      |      |       |        |      |
|-------------------|---------|--------|------|------|------|------|------|-------|--------|------|
| Jambi             | 103.64  | -1.63  | 1089 | 0.82 | 0.28 | 0.48 | 0.59 | 49.79 | -36.22 | 0.66 |
| Ji_Parana_SE      | -61.85  | -10.93 | 3716 | 0.88 | 0.08 | 0.18 | 0.95 | 32.33 | 2.11   | 0.93 |
| Jomsom            | 83.71   | 28.78  | 1138 | 0.83 | 0.04 | 0.06 | 1.16 | 40.13 | 20.50  | 0.98 |
| Kaashidhoo        | 73.47   | 4.97   | 1056 | 0.78 | 0.05 | 0.08 | 0.80 | 29.98 | -19.13 | 0.96 |
| Kangerlussuaq     | -50.62  | 67.00  | 2162 | 0.60 | 0.02 | 0.04 | 1.23 | 34.95 | 24.08  | 0.98 |
| Kanpur            | 80.23   | 26.51  | 8367 | 0.84 | 0.10 | 0.16 | 0.94 | 17.74 | -5.65  | 0.94 |
| Kanzelhohe_Obs    | 13.90   | 46.68  | 1923 | 0.75 | 0.04 | 0.05 | 1.19 | 41.43 | 24.62  | 0.97 |
| Karachi           | 67.14   | 24.95  | 3985 | 0.93 | 0.06 | 0.08 | 1.00 | 14.52 | 2.32   | 0.98 |
| Karlsruhe         | 8.43    | 49.09  | 2208 | 0.70 | 0.05 | 0.08 | 0.86 | 32.42 | -12.06 | 0.95 |
| Kathmandu-Bode    | 85.39   | 27.68  | 862  | 0.69 | 0.20 | 0.28 | 0.60 | 55.46 | -47.06 | 0.79 |
| KAUST_Campus      | 39.10   | 22.30  | 2035 | 0.88 | 0.08 | 0.13 | 0.91 | 19.00 | -5.58  | 0.95 |
| Kellogg_LTER      | -85.37  | 42.41  | 1968 | 0.69 | 0.07 | 0.11 | 1.06 | 41.37 | 10.73  | 0.94 |
| Kelowna_UAS       | -119.40 | 49.94  | 4458 | 0.58 | 0.04 | 0.08 | 1.12 | 41.10 | 13.29  | 0.93 |
| Key_Biscayne      | -80.16  | 25.73  | 3588 | 0.65 | 0.04 | 0.06 | 1.05 | 32.63 | 7.63   | 0.97 |
| Key_Biscayne2     | -80.16  | 25.73  | 2016 | 0.61 | 0.04 | 0.05 | 1.17 | 37.13 | 18.26  | 0.96 |
| Kirtland_AFB      | -106.51 | 34.95  | 1015 | 0.71 | 0.02 | 0.03 | 1.20 | 32.39 | 15.96  | 0.98 |
| Koforidua_ANUC    | -0.30   | 6.11   | 584  | 0.91 | 0.19 | 0.27 | 0.81 | 29.63 | -22.58 | 0.91 |
| KONZA_EDC         | -96.61  | 39.10  | 5198 | 0.59 | 0.06 | 0.09 | 1.16 | 40.56 | 18.51  | 0.94 |
| Kuching           | 110.35  | 1.49   | 682  | 0.86 | 0.15 | 0.33 | 0.72 | 35.23 | -20.85 | 0.81 |
| Kuopio            | 27.63   | 62.89  | 2273 | 0.84 | 0.02 | 0.04 | 1.06 | 26.75 | 9.99   | 0.98 |
| Kuujuarapik       | -77.76  | 55.28  | 1082 | 0.64 | 0.05 | 0.08 | 1.09 | 39.66 | 12.59  | 0.94 |
| Kuwait_University | 47.97   | 29.33  | 1206 | 0.97 | 0.05 | 0.09 | 0.98 | 9.82  | 0.07   | 0.98 |
| Kyiv              | 30.50   | 50.36  | 4277 | 0.79 | 0.05 | 0.07 | 0.93 | 29.55 | -6.74  | 0.97 |
| La_Jolla          | -117.25 | 32.87  | 4094 | 0.62 | 0.04 | 0.05 | 1.07 | 38.94 | 16.05  | 0.97 |
| La_Laguna         | -16.32  | 28.48  | 3492 | 0.88 | 0.05 | 0.08 | 1.04 | 33.25 | 12.61  | 0.97 |
| La_Parguera       | -67.05  | 17.97  | 8972 | 0.82 | 0.04 | 0.07 | 1.01 | 34.03 | 6.46   | 0.97 |

|                    |         |        |      |      |      |      |      |        |        |      |
|--------------------|---------|--------|------|------|------|------|------|--------|--------|------|
| La_Paz             | -68.07  | -16.54 | 4583 | 0.41 | 0.04 | 0.06 | 0.90 | 47.83  | -18.32 | 0.95 |
| Laegeren           | 8.36    | 47.48  | 2872 | 0.75 | 0.04 | 0.06 | 0.97 | 28.97  | 0.21   | 0.97 |
| Lahore             | 74.26   | 31.48  | 3702 | 0.73 | 0.15 | 0.24 | 0.89 | 25.45  | -11.53 | 0.87 |
| Lake_Argyle        | 128.75  | -16.11 | 8100 | 0.83 | 0.05 | 0.07 | 1.28 | 49.75  | 40.89  | 0.97 |
| Lake_Lefroy        | 121.71  | -31.25 | 2409 | 0.41 | 0.03 | 0.03 | 1.36 | 49.04  | 33.98  | 0.97 |
| Lamezia_Terne      | 16.23   | 38.88  | 622  | 0.76 | 0.05 | 0.07 | 0.94 | 32.54  | -0.83  | 0.97 |
| Lampedusa          | 12.63   | 35.52  | 4839 | 0.87 | 0.04 | 0.07 | 1.08 | 26.37  | 10.10  | 0.97 |
| LAMTO-STATION      | -5.03   | 6.22   | 265  | 0.62 | 0.38 | 0.55 | 0.63 | 44.99  | -39.46 | 0.51 |
| Lanai              | -156.92 | 20.74  | 3843 | 0.39 | 0.03 | 0.04 | 1.19 | 44.53  | 25.15  | 0.97 |
| LAQUILA_Coppito    | 13.35   | 42.37  | 929  | 0.79 | 0.03 | 0.05 | 1.08 | 33.68  | 13.51  | 0.98 |
| Le_Fauga           | 1.28    | 43.38  | 2533 | 0.73 | 0.05 | 0.07 | 0.86 | 35.98  | -9.80  | 0.96 |
| Lecce_University   | 18.11   | 40.34  | 7673 | 0.80 | 0.04 | 0.06 | 1.00 | 25.02  | 2.38   | 0.97 |
| Leipzig            | 12.44   | 51.35  | 4206 | 0.83 | 0.05 | 0.07 | 0.93 | 26.62  | -5.74  | 0.97 |
| Lille              | 3.14    | 50.61  | 4827 | 0.75 | 0.05 | 0.09 | 0.89 | 31.50  | -7.39  | 0.95 |
| Loftus_MO          | -0.86   | 54.56  | 199  | 0.68 | 0.03 | 0.05 | 1.16 | 37.68  | 21.75  | 0.97 |
| Luang_Namtha       | 101.42  | 20.93  | 1292 | 0.83 | 0.20 | 0.33 | 0.83 | 42.95  | -25.36 | 0.87 |
| Lubango            | 13.45   | -14.96 | 785  | 0.85 | 0.06 | 0.08 | 0.92 | 31.34  | -4.91  | 0.97 |
| Lulin              | 120.87  | 23.47  | 2059 | 0.56 | 0.23 | 0.27 | 4.35 | 134.47 | 134.20 | 0.63 |
| Lumbini            | 83.28   | 27.49  | 496  | 0.72 | 0.22 | 0.31 | 0.71 | 41.27  | -28.39 | 0.79 |
| Madrid             | -3.72   | 40.45  | 3524 | 0.76 | 0.03 | 0.05 | 0.94 | 36.78  | 2.28   | 0.98 |
| Magurele_Inoe      | 26.03   | 44.35  | 994  | 0.78 | 0.05 | 0.07 | 0.95 | 29.86  | -4.77  | 0.97 |
| Mainz              | 8.30    | 50.00  | 3617 | 0.77 | 0.05 | 0.07 | 0.88 | 28.92  | -10.48 | 0.97 |
| Malaga             | -4.48   | 36.72  | 4371 | 0.87 | 0.03 | 0.05 | 0.99 | 25.06  | 4.35   | 0.98 |
| Manaus_EMBRAPA     | -59.97  | -2.89  | 1449 | 0.75 | 0.06 | 0.10 | 0.94 | 34.29  | -2.98  | 0.95 |
| Manila_Observatory | 121.08  | 14.64  | 2284 | 0.45 | 0.11 | 0.20 | 0.69 | 45.83  | -21.41 | 0.81 |
| Manus              | 147.43  | -2.06  | 753  | 0.60 | 0.03 | 0.04 | 1.07 | 38.50  | 16.33  | 0.97 |

|                   |         |        |       |      |      |      |      |        |        |      |
|-------------------|---------|--------|-------|------|------|------|------|--------|--------|------|
| Maricopa          | -111.97 | 33.07  | 5058  | 0.64 | 0.04 | 0.05 | 1.35 | 40.77  | 30.41  | 0.96 |
| Martova           | 36.95   | 49.94  | 1134  | 0.78 | 0.04 | 0.06 | 0.93 | 29.31  | -5.75  | 0.98 |
| Masdar_Institute  | 54.62   | 24.44  | 3174  | 0.91 | 0.06 | 0.08 | 1.00 | 16.92  | -0.39  | 0.98 |
| Mauna_Loa         | -155.58 | 19.54  | 16676 | 0.20 | 0.07 | 0.08 | 5.25 | 135.92 | 135.09 | 0.85 |
| MCO-Hanimaadhoo   | 73.18   | 6.78   | 3910  | 0.77 | 0.06 | 0.10 | 0.84 | 23.65  | -15.73 | 0.95 |
| MD_Science_Center | -76.61  | 39.28  | 8473  | 0.73 | 0.07 | 0.12 | 1.08 | 41.68  | 15.85  | 0.94 |
| Medellin          | -75.58  | 6.26   | 655   | 0.54 | 0.12 | 0.19 | 0.71 | 53.41  | -32.03 | 0.86 |
| Medenine-IRA      | 10.64   | 33.50  | 2118  | 0.86 | 0.05 | 0.08 | 1.13 | 31.57  | 16.94  | 0.97 |
| Messina           | 15.57   | 38.20  | 3816  | 0.74 | 0.05 | 0.08 | 0.90 | 30.33  | -7.95  | 0.96 |
| MetObs_Lindenberg | 14.12   | 52.21  | 641   | 0.79 | 0.05 | 0.07 | 0.93 | 30.35  | -6.99  | 0.97 |
| Mexico_City       | -99.18  | 19.33  | 6282  | 0.42 | 0.18 | 0.25 | 0.55 | 70.81  | -57.21 | 0.76 |
| Mezaira           | 53.75   | 23.10  | 5513  | 0.93 | 0.05 | 0.08 | 1.07 | 15.82  | 8.84   | 0.98 |
| Midway_Island     | -177.38 | 28.21  | 3199  | 0.64 | 0.03 | 0.05 | 1.07 | 35.92  | 12.81  | 0.97 |
| Mingo             | -90.14  | 36.97  | 894   | 0.53 | 0.07 | 0.10 | 1.06 | 46.72  | 11.41  | 0.94 |
| Minsk             | 27.60   | 53.92  | 4736  | 0.85 | 0.05 | 0.08 | 0.93 | 31.44  | -6.29  | 0.97 |
| Missoula          | -114.08 | 46.92  | 5695  | 0.68 | 0.06 | 0.10 | 0.96 | 43.93  | 5.51   | 0.92 |
| Modena            | 10.95   | 44.63  | 4627  | 0.65 | 0.08 | 0.12 | 0.82 | 36.77  | -15.38 | 0.93 |
| Modesto           | -120.99 | 37.64  | 473   | 0.69 | 0.04 | 0.06 | 1.04 | 42.98  | 12.17  | 0.96 |
| Moldova           | 28.82   | 47.00  | 7620  | 0.86 | 0.04 | 0.06 | 0.97 | 22.02  | -3.88  | 0.98 |
| Mongu             | 23.15   | -15.25 | 8104  | 0.89 | 0.06 | 0.10 | 0.81 | 28.98  | -16.24 | 0.96 |
| Mongu_Inn         | 23.13   | -15.27 | 2069  | 0.86 | 0.09 | 0.13 | 0.71 | 41.76  | -28.92 | 0.94 |
| Monterey          | -121.85 | 36.59  | 4681  | 0.71 | 0.04 | 0.05 | 1.21 | 39.71  | 24.23  | 0.96 |
| Montsec           | 0.73    | 42.05  | 2435  | 0.79 | 0.04 | 0.05 | 1.47 | 61.17  | 54.08  | 0.97 |
| Moscow_MSU_MO     | 37.52   | 55.71  | 5119  | 0.92 | 0.04 | 0.07 | 0.92 | 22.08  | -6.17  | 0.97 |
| Mukdahan          | 104.68  | 16.61  | 3063  | 0.93 | 0.07 | 0.10 | 0.97 | 19.34  | -1.96  | 0.98 |
| Munich_University | 11.57   | 48.15  | 3450  | 0.76 | 0.04 | 0.06 | 0.90 | 30.61  | -8.73  | 0.97 |

|                |         |        |      |      |      |      |      |       |        |      |
|----------------|---------|--------|------|------|------|------|------|-------|--------|------|
| Murcia         | -1.17   | 38.00  | 3592 | 0.80 | 0.04 | 0.06 | 0.88 | 33.74 | -3.47  | 0.97 |
| Mussafa        | 54.47   | 24.37  | 2670 | 0.98 | 0.03 | 0.04 | 0.99 | 9.12  | -0.28  | 0.99 |
| Nainital       | 79.46   | 29.36  | 881  | 0.83 | 0.11 | 0.14 | 1.41 | 56.77 | 50.13  | 0.93 |
| Nairobi        | 36.87   | -1.34  | 784  | 0.47 | 0.05 | 0.08 | 0.72 | 36.92 | -27.83 | 0.93 |
| NAM_CO         | 90.96   | 30.77  | 2021 | 0.76 | 0.02 | 0.03 | 1.14 | 32.38 | 13.12  | 0.98 |
| Namibe         | 12.18   | -15.16 | 404  | 0.80 | 0.08 | 0.11 | 0.88 | 28.71 | -11.03 | 0.95 |
| Napoli_CeSMA   | 14.31   | 40.84  | 282  | 0.67 | 0.04 | 0.06 | 0.90 | 36.07 | -6.45  | 0.96 |
| NASA_KSC       | -80.66  | 28.46  | 464  | 0.51 | 0.05 | 0.07 | 1.38 | 48.25 | 35.02  | 0.95 |
| NASA_LaRC      | -76.38  | 37.10  | 1938 | 0.63 | 0.06 | 0.08 | 1.25 | 43.71 | 26.69  | 0.95 |
| Nauru          | 166.92  | -0.52  | 3573 | 0.59 | 0.02 | 0.03 | 1.07 | 30.79 | 10.05  | 0.98 |
| NCU_Taiwan     | 121.19  | 24.97  | 1900 | 0.50 | 0.20 | 0.33 | 0.68 | 47.47 | -19.56 | 0.72 |
| ND_Marbel_Univ | 124.84  | 6.50   | 1854 | 0.65 | 0.06 | 0.09 | 0.71 | 43.63 | -30.86 | 0.93 |
| NEON_CVALLA    | -105.17 | 40.16  | 2452 | 0.61 | 0.04 | 0.06 | 1.10 | 44.53 | 17.68  | 0.96 |
| NEON_Harvard   | -72.17  | 42.54  | 1008 | 0.53 | 0.06 | 0.09 | 1.62 | 64.28 | 55.15  | 0.93 |
| NEON_KONZ      | -96.56  | 39.10  | 818  | 0.61 | 0.06 | 0.08 | 1.42 | 50.09 | 36.93  | 0.94 |
| NEON_MOAB      | -109.39 | 38.25  | 1189 | 0.59 | 0.03 | 0.04 | 1.58 | 53.90 | 47.38  | 0.96 |
| NEON_OAES      | -99.06  | 35.41  | 1284 | 0.65 | 0.04 | 0.06 | 1.33 | 42.58 | 30.52  | 0.96 |
| NEON_ONAQ      | -112.45 | 40.18  | 1167 | 0.65 | 0.04 | 0.05 | 1.44 | 53.64 | 40.53  | 0.96 |
| NEON_ORNL      | -84.28  | 35.96  | 949  | 0.62 | 0.05 | 0.08 | 1.20 | 44.79 | 25.68  | 0.95 |
| NEON_OSBS      | -81.99  | 29.69  | 1350 | 0.68 | 0.05 | 0.07 | 1.40 | 44.77 | 35.91  | 0.96 |
| NEON_RMNP      | -105.55 | 40.28  | 881  | 0.62 | 0.03 | 0.05 | 1.60 | 67.03 | 57.06  | 0.96 |
| NEON_SCBI      | -78.14  | 38.89  | 910  | 0.66 | 0.07 | 0.10 | 1.42 | 52.15 | 39.59  | 0.93 |
| NEON_SERC      | -76.56  | 38.89  | 451  | 0.48 | 0.07 | 0.09 | 1.47 | 49.36 | 37.93  | 0.93 |
| NEON_Sterling  | -103.03 | 40.46  | 1241 | 0.59 | 0.04 | 0.06 | 1.59 | 57.45 | 49.60  | 0.95 |
| NEON_TALL      | -87.39  | 32.95  | 1150 | 0.58 | 0.06 | 0.08 | 1.32 | 48.37 | 35.43  | 0.95 |
| NEON_UKFS      | -95.19  | 39.04  | 563  | 0.52 | 0.05 | 0.07 | 1.24 | 40.80 | 20.35  | 0.96 |



|                   |         |       |      |      |      |      |      |       |        |      |
|-------------------|---------|-------|------|------|------|------|------|-------|--------|------|
| NEON_UNDE         | -89.54  | 46.23 | 793  | 0.67 | 0.06 | 0.10 | 1.36 | 52.58 | 38.28  | 0.92 |
| NEON_WOOD         | -99.24  | 47.13 | 734  | 0.76 | 0.07 | 0.15 | 1.24 | 52.37 | 32.49  | 0.89 |
| NEON-CPER         | -104.74 | 40.81 | 943  | 0.57 | 0.04 | 0.05 | 1.42 | 55.15 | 42.00  | 0.96 |
| NEON-Disney       | -81.44  | 28.13 | 816  | 0.58 | 0.05 | 0.07 | 1.34 | 43.18 | 30.92  | 0.95 |
| Nes_Ziona         | 34.79   | 31.92 | 7873 | 0.90 | 0.04 | 0.06 | 0.99 | 19.90 | 0.95   | 0.98 |
| NGHIA_DO          | 105.80  | 21.05 | 1089 | 0.78 | 0.24 | 0.34 | 0.70 | 42.03 | -35.59 | 0.81 |
| NhaTrang          | 109.21  | 12.20 | 1086 | 0.86 | 0.05 | 0.08 | 0.90 | 26.82 | -4.60  | 0.97 |
| Nong_Khai         | 102.72  | 17.88 | 784  | 0.87 | 0.17 | 0.24 | 0.81 | 31.04 | -16.01 | 0.91 |
| Noto              | 137.14  | 37.33 | 2082 | 0.80 | 0.08 | 0.12 | 1.14 | 31.94 | 16.76  | 0.95 |
| OHP_OBSERVATOIRE  | 5.71    | 43.94 | 6675 | 0.80 | 0.03 | 0.05 | 1.16 | 38.15 | 24.18  | 0.98 |
| Omkoi             | 98.43   | 17.80 | 1440 | 0.79 | 0.12 | 0.20 | 1.19 | 38.80 | 23.01  | 0.91 |
| Oostende          | 2.93    | 51.22 | 3205 | 0.76 | 0.05 | 0.08 | 0.97 | 29.26 | 1.07   | 0.96 |
| OPAL              | -85.94  | 79.99 | 1639 | 0.58 | 0.03 | 0.04 | 1.34 | 43.03 | 32.14  | 0.97 |
| Osaka             | 135.59  | 34.65 | 5534 | 0.74 | 0.09 | 0.14 | 0.93 | 34.03 | -2.69  | 0.93 |
| Ouagadougou       | -1.49   | 12.42 | 4231 | 0.73 | 0.14 | 0.22 | 0.91 | 31.73 | -4.51  | 0.89 |
| Ouarzazate        | -6.91   | 30.93 | 2714 | 0.81 | 0.05 | 0.08 | 1.04 | 41.44 | 11.44  | 0.97 |
| Oujda             | -1.90   | 34.65 | 2340 | 0.85 | 0.05 | 0.07 | 0.86 | 34.16 | -7.33  | 0.97 |
| Palaiseau         | 2.22    | 48.71 | 5110 | 0.78 | 0.05 | 0.07 | 0.99 | 30.39 | 3.66   | 0.97 |
| Palangkaraya      | 113.95  | -2.23 | 1433 | 0.81 | 0.23 | 0.56 | 0.57 | 43.54 | -19.25 | 0.49 |
| Palencia          | -4.52   | 41.99 | 6596 | 0.75 | 0.03 | 0.05 | 1.03 | 36.74 | 8.02   | 0.97 |
| Palma_de_Mallorca | 2.63    | 39.55 | 3643 | 0.83 | 0.04 | 0.06 | 1.00 | 30.14 | 5.99   | 0.98 |
| Pantnagar         | 79.52   | 29.05 | 984  | 0.88 | 0.11 | 0.16 | 0.85 | 24.50 | -15.08 | 0.94 |
| Paris             | 2.36    | 48.85 | 3632 | 0.79 | 0.04 | 0.07 | 0.93 | 28.71 | -4.94  | 0.97 |
| PEARL             | -86.42  | 80.05 | 2501 | 0.62 | 0.03 | 0.04 | 1.40 | 46.89 | 38.88  | 0.97 |
| Petrolina_SONDA   | -40.32  | -9.07 | 2947 | 0.74 | 0.03 | 0.04 | 1.06 | 36.40 | 17.04  | 0.98 |
| Pickle_Lake       | -90.22  | 51.45 | 3837 | 0.58 | 0.05 | 0.09 | 1.28 | 46.73 | 26.70  | 0.93 |

|                    |         |        |      |      |      |      |      |       |        |      |
|--------------------|---------|--------|------|------|------|------|------|-------|--------|------|
| Pimai              | 102.56  | 15.18  | 1733 | 0.90 | 0.08 | 0.11 | 0.94 | 22.03 | -5.31  | 0.97 |
| Pokhara            | 83.98   | 28.19  | 3415 | 0.66 | 0.22 | 0.33 | 0.54 | 63.47 | -56.85 | 0.72 |
| Pontianak          | 109.19  | 0.08   | 1487 | 0.87 | 0.20 | 0.43 | 0.64 | 42.25 | -24.53 | 0.73 |
| Poprad-Ganovce     | 20.32   | 49.04  | 718  | 0.77 | 0.04 | 0.06 | 0.89 | 35.98 | -8.33  | 0.97 |
| Porquerolles       | 6.16    | 43.00  | 1531 | 0.82 | 0.04 | 0.06 | 1.09 | 36.14 | 18.37  | 0.98 |
| Pretoria_CSIR-DPSS | 28.28   | -25.76 | 3137 | 0.78 | 0.05 | 0.07 | 0.77 | 36.02 | -23.08 | 0.96 |
| Puerto_Madryn      | -65.01  | -42.79 | 849  | 0.41 | 0.04 | 0.05 | 1.88 | 68.84 | 60.56  | 0.94 |
| Pune               | 73.81   | 18.54  | 3466 | 0.73 | 0.13 | 0.17 | 0.75 | 39.74 | -32.70 | 0.90 |
| Pusan_NU           | 129.08  | 35.24  | 1039 | 0.77 | 0.09 | 0.14 | 0.89 | 34.51 | -4.79  | 0.93 |
| QOMS_CAS           | 86.95   | 28.37  | 3341 | 0.66 | 0.02 | 0.04 | 1.28 | 50.45 | 18.24  | 0.98 |
| Raciborz           | 18.19   | 50.08  | 650  | 0.74 | 0.06 | 0.08 | 0.78 | 39.31 | -26.16 | 0.95 |
| Ragged_Point       | -59.43  | 13.17  | 3845 | 0.86 | 0.04 | 0.06 | 1.06 | 32.03 | 11.99  | 0.98 |
| Railroad_Valley    | -115.69 | 38.50  | 8399 | 0.63 | 0.03 | 0.05 | 1.39 | 49.63 | 37.94  | 0.97 |
| Rame_Head          | -4.22   | 50.32  | 722  | 0.68 | 0.04 | 0.06 | 0.94 | 35.12 | 1.06   | 0.96 |
| Ras_El_Ain         | -7.60   | 31.67  | 1133 | 0.79 | 0.08 | 0.12 | 0.84 | 36.64 | -17.62 | 0.95 |
| Red_Mountain_Pass  | -107.71 | 37.91  | 3822 | 0.63 | 0.03 | 0.04 | 1.54 | 61.86 | 51.51  | 0.97 |
| Resolute_Bay       | -94.97  | 74.71  | 1510 | 0.62 | 0.04 | 0.07 | 1.19 | 40.38 | 25.45  | 0.94 |
| REUNION_ST_DENIS   | 55.48   | -20.90 | 4423 | 0.62 | 0.02 | 0.03 | 1.15 | 32.33 | 17.05  | 0.98 |
| Rimrock            | -116.99 | 46.49  | 6250 | 0.71 | 0.04 | 0.07 | 1.15 | 43.41 | 19.89  | 0.95 |
| Rio_Branco         | -67.87  | -9.96  | 5191 | 0.87 | 0.08 | 0.16 | 0.80 | 36.15 | -16.15 | 0.93 |
| Rogers_Dry_Lake    | -117.89 | 34.93  | 4399 | 0.66 | 0.03 | 0.04 | 1.16 | 38.44 | 21.68  | 0.98 |
| Rome_Tor_Vergata   | 12.65   | 41.84  | 8244 | 0.81 | 0.04 | 0.06 | 0.88 | 26.65 | -11.11 | 0.97 |
| Rottnest_Island    | 115.50  | -32.00 | 1102 | 0.65 | 0.01 | 0.02 | 1.12 | 26.68 | 15.32  | 0.99 |
| Saada              | -8.16   | 31.63  | 7368 | 0.82 | 0.07 | 0.10 | 0.84 | 36.28 | -17.12 | 0.96 |
| Sable_Island       | -60.01  | 43.93  | 938  | 0.54 | 0.04 | 0.07 | 1.23 | 37.13 | 22.03  | 0.94 |
| SACOL              | 104.14  | 35.95  | 3471 | 0.63 | 0.13 | 0.19 | 0.69 | 44.46 | -36.17 | 0.85 |

|                     |         |        |       |      |      |      |      |       |        |      |
|---------------------|---------|--------|-------|------|------|------|------|-------|--------|------|
| San_Nicolas         | -119.49 | 33.26  | 2703  | 0.65 | 0.04 | 0.04 | 1.36 | 49.28 | 38.85  | 0.97 |
| Sandia_NM_PSEL      | -106.54 | 35.05  | 2096  | 0.64 | 0.03 | 0.04 | 1.31 | 43.42 | 29.52  | 0.98 |
| SANTA_CRUZ          | -63.18  | -17.80 | 1133  | 0.88 | 0.06 | 0.11 | 0.86 | 36.32 | -5.69  | 0.95 |
| Santa_Cruz_Tenerife | -16.25  | 28.47  | 8101  | 0.87 | 0.05 | 0.08 | 0.95 | 34.89 | 2.84   | 0.97 |
| SANTA_CRUZ_UTEPSA   | -63.20  | -17.77 | 1778  | 0.87 | 0.08 | 0.15 | 0.92 | 33.84 | -4.01  | 0.93 |
| Santa_Monica_Colg   | -118.47 | 34.02  | 2714  | 0.57 | 0.04 | 0.06 | 1.00 | 42.33 | 9.59   | 0.96 |
| Santiago_Beauchef   | -70.66  | -33.46 | 1385  | 0.55 | 0.10 | 0.13 | 0.44 | 84.18 | -80.39 | 0.85 |
| Sao_Martinho_SONDA  | -53.82  | -29.44 | 1273  | 0.62 | 0.05 | 0.08 | 1.20 | 47.59 | 28.28  | 0.93 |
| Sao_Paulo           | -46.73  | -23.56 | 3485  | 0.68 | 0.08 | 0.12 | 0.68 | 47.96 | -34.58 | 0.91 |
| Saturn_Island       | -123.13 | 48.78  | 4910  | 0.63 | 0.05 | 0.07 | 1.44 | 53.98 | 44.23  | 0.94 |
| SEARCH-Centreville  | -87.25  | 32.90  | 1683  | 0.65 | 0.06 | 0.08 | 1.23 | 45.32 | 29.97  | 0.95 |
| SEARCH-OLF          | -87.38  | 30.55  | 1885  | 0.65 | 0.06 | 0.08 | 1.23 | 44.01 | 28.25  | 0.95 |
| SEARCH-Yorkville    | -85.05  | 33.93  | 1291  | 0.58 | 0.05 | 0.08 | 1.21 | 44.91 | 26.92  | 0.95 |
| SEDE_BOKER          | 34.78   | 30.86  | 14534 | 0.89 | 0.04 | 0.06 | 1.14 | 24.37 | 15.86  | 0.98 |
| Seoul_SNU           | 126.95  | 37.46  | 1652  | 0.76 | 0.15 | 0.24 | 0.85 | 39.28 | -14.30 | 0.88 |
| SERC                | -76.56  | 38.89  | 5624  | 0.74 | 0.07 | 0.12 | 1.10 | 40.02 | 17.91  | 0.94 |
| Sevastopol          | 33.52   | 44.62  | 4259  | 0.88 | 0.03 | 0.04 | 0.99 | 17.76 | -0.07  | 0.99 |
| Sevilleta           | -106.89 | 34.35  | 10558 | 0.67 | 0.03 | 0.04 | 1.31 | 43.05 | 29.73  | 0.97 |
| Seysses             | 1.26    | 43.50  | 1436  | 0.73 | 0.04 | 0.06 | 0.93 | 35.05 | -0.90  | 0.97 |
| Shirahama           | 135.36  | 33.69  | 5948  | 0.80 | 0.07 | 0.10 | 1.03 | 27.82 | 6.62   | 0.95 |
| Sigma_Space_Corp    | -76.84  | 38.95  | 836   | 0.62 | 0.06 | 0.09 | 1.39 | 47.78 | 33.56  | 0.93 |
| Silpakorn_Univ      | 100.04  | 13.82  | 5025  | 0.84 | 0.11 | 0.16 | 0.91 | 25.94 | -4.99  | 0.94 |
| Simonstown_IMT      | 18.45   | -34.19 | 883   | 0.67 | 0.03 | 0.04 | 1.25 | 39.09 | 27.25  | 0.97 |
| Singapore           | 103.78  | 1.30   | 3175  | 0.79 | 0.14 | 0.26 | 0.75 | 33.63 | -18.91 | 0.83 |
| Sioux_Falls         | -96.63  | 43.74  | 5237  | 0.63 | 0.05 | 0.08 | 1.17 | 41.92 | 17.02  | 0.95 |
| Sirmione_Museo_GC   | 10.61   | 45.50  | 891   | 0.68 | 0.08 | 0.12 | 0.86 | 40.67 | -6.37  | 0.93 |

|                     |         |        |       |      |      |      |      |        |        |      |
|---------------------|---------|--------|-------|------|------|------|------|--------|--------|------|
| Skukuza             | 31.59   | -24.99 | 5981  | 0.90 | 0.04 | 0.06 | 0.89 | 23.02  | -6.39  | 0.98 |
| SMHI                | 16.15   | 58.58  | 723   | 0.77 | 0.03 | 0.05 | 1.07 | 27.03  | 11.55  | 0.98 |
| Sodankyla           | 26.63   | 67.37  | 1226  | 0.65 | 0.03 | 0.04 | 1.21 | 39.01  | 22.48  | 0.97 |
| Solar_Village       | 46.40   | 24.91  | 11557 | 0.97 | 0.03 | 0.05 | 1.03 | 9.77   | 5.96   | 0.99 |
| Son_La              | 103.91  | 21.33  | 699   | 0.86 | 0.24 | 0.34 | 0.83 | 34.17  | -20.58 | 0.87 |
| Songkhla_Met_Sta    | 100.60  | 7.18   | 2430  | 0.83 | 0.06 | 0.09 | 0.95 | 27.85  | 0.40   | 0.96 |
| SP_Bayboro          | -82.63  | 27.76  | 2016  | 0.52 | 0.05 | 0.07 | 1.43 | 49.74  | 38.93  | 0.94 |
| St_Louis_University | -90.23  | 38.64  | 1455  | 0.73 | 0.06 | 0.09 | 1.17 | 42.62  | 21.93  | 0.95 |
| Stennis             | -89.62  | 30.37  | 1371  | 0.78 | 0.06 | 0.09 | 1.03 | 35.47  | 8.07   | 0.96 |
| Strzyzow            | 21.86   | 49.88  | 1332  | 0.76 | 0.04 | 0.06 | 0.97 | 30.14  | -1.50  | 0.97 |
| Tabernas_PSA-DLR    | -2.36   | 37.09  | 2192  | 0.88 | 0.03 | 0.05 | 1.00 | 30.87  | 9.59   | 0.98 |
| Table_Mountain      | -105.24 | 40.13  | 4387  | 0.59 | 0.03 | 0.05 | 1.15 | 46.29  | 22.39  | 0.97 |
| TABLE_MOUNTAIN_CA   | -117.68 | 34.38  | 6897  | 0.61 | 0.05 | 0.06 | 2.11 | 84.16  | 81.28  | 0.94 |
| Tahiti              | -149.61 | -17.58 | 2346  | 0.34 | 0.03 | 0.04 | 1.03 | 37.20  | 3.04   | 0.97 |
| Tai_Ping            | 114.36  | 10.38  | 446   | 0.82 | 0.03 | 0.05 | 0.88 | 24.44  | -7.62  | 0.98 |
| Taihu               | 120.22  | 31.42  | 2881  | 0.79 | 0.18 | 0.27 | 0.97 | 27.21  | 1.77   | 0.88 |
| Taipei_CWB          | 121.54  | 25.01  | 2527  | 0.65 | 0.17 | 0.26 | 0.79 | 42.76  | -11.28 | 0.83 |
| Tallahassee         | -84.30  | 30.45  | 1723  | 0.69 | 0.05 | 0.07 | 1.31 | 43.67  | 32.03  | 0.96 |
| Tamanrasset_INM     | 5.53    | 22.79  | 8402  | 0.79 | 0.09 | 0.14 | 1.09 | 43.70  | 22.87  | 0.93 |
| Taylor_Ranch_TWRS   | -114.85 | 45.10  | 918   | 0.69 | 0.05 | 0.11 | 1.06 | 47.80  | 23.12  | 0.90 |
| Technion_Haifa_IL   | 35.02   | 32.78  | 380   | 0.78 | 0.04 | 0.05 | 1.04 | 23.15  | 4.62   | 0.98 |
| Teide               | -16.64  | 28.27  | 1913  | 0.77 | 0.10 | 0.13 | 3.31 | 133.21 | 132.36 | 0.88 |
| The_Hague           | 4.33    | 52.11  | 897   | 0.76 | 0.06 | 0.09 | 0.88 | 33.53  | -10.60 | 0.95 |
| Thessaloniki        | 22.96   | 40.63  | 6596  | 0.78 | 0.06 | 0.08 | 0.91 | 30.22  | -7.68  | 0.96 |
| Thompson            | -97.85  | 55.80  | 1072  | 0.44 | 0.14 | 0.26 | 1.45 | 64.66  | 38.40  | 0.76 |
| Thompson_Farm       | -70.95  | 43.11  | 3913  | 0.58 | 0.06 | 0.09 | 1.25 | 45.88  | 26.20  | 0.94 |

|                     |         |        |      |      |      |      |      |       |        |      |
|---------------------|---------|--------|------|------|------|------|------|-------|--------|------|
| Thule               | -68.77  | 76.52  | 2882 | 0.62 | 0.02 | 0.04 | 1.11 | 31.84 | 14.82  | 0.97 |
| Timisoara           | 21.23   | 45.75  | 745  | 0.80 | 0.05 | 0.07 | 0.94 | 24.40 | -6.06  | 0.97 |
| Tinga_Tingana       | 139.99  | -28.98 | 4468 | 0.65 | 0.04 | 0.06 | 1.49 | 55.02 | 46.77  | 0.96 |
| Tizi_Ouzou          | 4.06    | 36.70  | 1987 | 0.83 | 0.06 | 0.09 | 0.81 | 34.94 | -23.19 | 0.96 |
| Tomsk               | 85.05   | 56.48  | 2494 | 0.86 | 0.03 | 0.07 | 0.97 | 20.93 | -0.45  | 0.97 |
| Tomsk_22            | 84.07   | 56.42  | 1633 | 0.93 | 0.06 | 0.11 | 0.97 | 28.07 | 0.58   | 0.96 |
| Toravere            | 26.47   | 58.26  | 4500 | 0.90 | 0.03 | 0.05 | 1.01 | 24.36 | 4.04   | 0.98 |
| Toronto             | -79.47  | 43.79  | 4246 | 0.65 | 0.06 | 0.10 | 1.13 | 42.15 | 17.53  | 0.94 |
| Toulon              | 6.01    | 43.14  | 5307 | 0.77 | 0.04 | 0.06 | 1.06 | 33.21 | 11.92  | 0.97 |
| Toulouse_MF         | 1.37    | 43.57  | 1355 | 0.68 | 0.04 | 0.05 | 0.98 | 36.39 | 1.85   | 0.97 |
| Trelew              | -65.31  | -43.25 | 5736 | 0.30 | 0.05 | 0.06 | 2.09 | 70.86 | 63.17  | 0.93 |
| Trinidad_Head       | -124.15 | 41.05  | 3433 | 0.41 | 0.05 | 0.09 | 1.07 | 49.43 | 20.19  | 0.92 |
| Tsumkwe             | 20.44   | -19.62 | 865  | 0.86 | 0.05 | 0.07 | 0.99 | 39.97 | 15.41  | 0.97 |
| TUBITAK_UZAY_Ankara | 32.78   | 39.89  | 1020 | 0.81 | 0.03 | 0.05 | 0.92 | 20.67 | -8.13  | 0.98 |
| Tucson              | -110.95 | 32.23  | 4371 | 0.69 | 0.03 | 0.04 | 1.33 | 42.36 | 30.81  | 0.97 |
| Tudor_Hill          | -64.88  | 32.26  | 1635 | 0.61 | 0.04 | 0.06 | 1.04 | 33.22 | 8.34   | 0.97 |
| Tunis_Carthage      | 10.20   | 36.84  | 2811 | 0.79 | 0.05 | 0.08 | 0.94 | 31.02 | -4.13  | 0.96 |
| Tuxtla_Gutierrez    | -93.15  | 16.75  | 2176 | 0.81 | 0.09 | 0.15 | 0.77 | 45.08 | -30.59 | 0.92 |
| U_of_Wisconsin_SSEC | -89.41  | 43.07  | 1792 | 0.71 | 0.06 | 0.10 | 1.12 | 42.75 | 19.28  | 0.94 |
| UAHuntsville        | -86.64  | 34.73  | 1443 | 0.75 | 0.05 | 0.07 | 1.03 | 34.86 | 8.01   | 0.96 |
| Ubon_Ratchathani    | 104.87  | 15.25  | 2531 | 0.89 | 0.10 | 0.16 | 0.99 | 25.44 | 1.55   | 0.95 |
| UCLA                | -118.44 | 34.07  | 1447 | 0.62 | 0.05 | 0.08 | 0.75 | 41.38 | -17.79 | 0.95 |
| UCSB                | -119.85 | 34.42  | 5097 | 0.65 | 0.03 | 0.05 | 0.95 | 41.35 | 6.61   | 0.97 |
| UdeConcepcion-CEFOP | -73.03  | -36.84 | 996  | 0.36 | 0.03 | 0.04 | 1.04 | 41.60 | 11.40  | 0.96 |
| UH_Coastal_Center   | -95.04  | 29.39  | 1303 | 0.56 | 0.06 | 0.09 | 1.11 | 41.89 | 15.37  | 0.94 |
| UMBC                | -76.71  | 39.25  | 2549 | 0.71 | 0.06 | 0.09 | 1.17 | 40.17 | 20.40  | 0.95 |

|                     |         |        |      |      |      |      |      |       |        |      |
|---------------------|---------|--------|------|------|------|------|------|-------|--------|------|
| Univ_of_Houston     | -95.34  | 29.72  | 4290 | 0.65 | 0.06 | 0.08 | 1.13 | 36.69 | 17.36  | 0.95 |
| Univ_of_Lethbridge  | -112.87 | 49.68  | 2524 | 0.69 | 0.05 | 0.08 | 1.26 | 48.12 | 28.73  | 0.94 |
| Univ_of_Nevada-Reno | -119.81 | 39.54  | 3222 | 0.70 | 0.04 | 0.07 | 1.30 | 45.55 | 28.76  | 0.94 |
| UPC-GEAB-Valledupar | -73.33  | 9.56   | 222  | 0.20 | 0.08 | 0.11 | 1.16 | 39.18 | 9.61   | 0.91 |
| Upington            | 21.16   | -28.38 | 863  | 0.69 | 0.03 | 0.05 | 1.19 | 52.59 | 31.11  | 0.97 |
| UPRM_Lidar_Lab      | -67.14  | 18.21  | 1108 | 0.86 | 0.04 | 0.06 | 1.08 | 37.82 | 15.69  | 0.98 |
| USGS_Flagstaff_ROLO | -111.63 | 35.21  | 1415 | 0.66 | 0.03 | 0.04 | 1.58 | 54.78 | 47.05  | 0.97 |
| USM_Penang          | 100.30  | 5.36   | 1616 | 0.78 | 0.12 | 0.19 | 0.78 | 35.87 | -18.90 | 0.88 |
| Ussuriysk           | 132.16  | 43.70  | 3342 | 0.71 | 0.08 | 0.15 | 0.98 | 33.77 | -4.50  | 0.92 |
| Valladolid          | -4.71   | 41.66  | 2604 | 0.77 | 0.03 | 0.04 | 1.04 | 37.49 | 10.62  | 0.98 |
| Venise              | 12.51   | 45.31  | 3947 | 0.75 | 0.07 | 0.12 | 1.01 | 30.46 | 8.51   | 0.94 |
| Villefranche        | 7.33    | 43.68  | 4941 | 0.76 | 0.05 | 0.08 | 0.88 | 35.09 | -8.34  | 0.96 |
| Walker_Branch       | -84.29  | 35.96  | 3744 | 0.70 | 0.08 | 0.12 | 0.95 | 42.44 | 5.66   | 0.93 |
| Wallops             | -75.47  | 37.93  | 6797 | 0.75 | 0.07 | 0.11 | 1.09 | 40.94 | 17.05  | 0.94 |
| Waskesiu            | -106.07 | 53.91  | 3351 | 0.52 | 0.06 | 0.11 | 1.18 | 47.95 | 24.64  | 0.91 |
| Weizmann_Institute  | 34.81   | 31.91  | 817  | 0.80 | 0.04 | 0.07 | 0.96 | 25.99 | -2.94  | 0.97 |
| White_Sands_HELSTF  | -106.34 | 32.63  | 6464 | 0.64 | 0.04 | 0.05 | 1.42 | 49.15 | 39.55  | 0.97 |
| Windpoort           | 15.48   | -19.37 | 1186 | 0.77 | 0.05 | 0.08 | 1.04 | 44.78 | 19.31  | 0.96 |
| Wits_University     | 28.03   | -26.19 | 1783 | 0.67 | 0.05 | 0.08 | 0.75 | 43.52 | -22.01 | 0.95 |
| Wytham_Woods        | -1.33   | 51.77  | 936  | 0.74 | 0.05 | 0.07 | 0.95 | 32.53 | -1.36  | 0.96 |
| Xanthi              | 24.92   | 41.15  | 1394 | 0.76 | 0.07 | 0.09 | 0.80 | 32.00 | -20.00 | 0.95 |
| XiangHe             | 116.96  | 39.75  | 6981 | 0.84 | 0.22 | 0.37 | 0.79 | 37.25 | -11.88 | 0.84 |
| Xinglong            | 117.58  | 40.40  | 2778 | 0.82 | 0.13 | 0.21 | 1.15 | 41.63 | 17.84  | 0.91 |
| Yakutsk             | 129.37  | 61.66  | 3878 | 0.80 | 0.05 | 0.12 | 1.00 | 32.50 | 7.94   | 0.93 |
| Yekaterinburg       | 59.54   | 57.04  | 2592 | 0.92 | 0.04 | 0.07 | 0.96 | 24.16 | -0.83  | 0.98 |
| Yellowknife_Aurora  | -114.38 | 62.45  | 2150 | 0.51 | 0.08 | 0.20 | 1.20 | 45.38 | 22.60  | 0.81 |

|                   |         |       |      |      |      |      |      |       |        |      |
|-------------------|---------|-------|------|------|------|------|------|-------|--------|------|
| Yonsei_University | 126.93  | 37.56 | 3419 | 0.78 | 0.15 | 0.24 | 0.84 | 38.16 | -15.56 | 0.88 |
| Yuma              | -114.58 | 32.64 | 1831 | 0.49 | 0.05 | 0.06 | 1.68 | 59.30 | 54.42  | 0.94 |
| Zaragoza          | -0.88   | 41.63 | 2693 | 0.74 | 0.04 | 0.06 | 0.98 | 37.00 | 5.35   | 0.97 |
| Zinder_Airport    | 8.99    | 13.78 | 4873 | 0.68 | 0.17 | 0.24 | 0.96 | 37.89 | 7.55   | 0.86 |
| Zvenigorod        | 36.78   | 55.70 | 2448 | 0.87 | 0.03 | 0.05 | 0.97 | 23.49 | -0.83  | 0.98 |

**Table S5.** Location information from the 37 CARSNET sites in China and results for the statistical comparison with three-hourly MERRA-2 AOD. R is (Pearson) correlation coefficient, MAE is the mean absolute error, RMSE is the root-mean-square error of the differences, RMB is the relative mean bias, MFE is the mean fractional error, FGE is the fractional gross error and IOA is the index of agreement.

| Site names      | Lat.   | Lon.  | Number of collocations | R    | MAE  | RMSE | RMB  | MFE   | MFB    | IOA  |
|-----------------|--------|-------|------------------------|------|------|------|------|-------|--------|------|
| Akedala         | 87.97  | 47.12 | 2205                   | 0.56 | 0.06 | 0.13 | 0.95 | 37.00 | 5.19   | 0.89 |
| Beijing         | 116.47 | 39.8  | 4930                   | 0.69 | 0.27 | 0.41 | 0.60 | 53.90 | -47.68 | 0.73 |
| Changde         | 111.7  | 29.17 | 676                    | 0.76 | 0.16 | 0.22 | 1.14 | 31.81 | 15.96  | 0.89 |
| Chengdu         | 104.03 | 30.65 | 723                    | 0.64 | 0.33 | 0.42 | 0.65 | 45.21 | -40.41 | 0.66 |
| Dalian          | 121.63 | 38.9  | 2564                   | 0.81 | 0.14 | 0.22 | 0.84 | 34.32 | -18.47 | 0.90 |
| Datong          | 113.33 | 40.1  | 6859                   | 0.66 | 0.24 | 0.31 | 0.46 | 79.44 | -76.38 | 0.72 |
| Dongsheng       | 109.98 | 39.83 | 615                    | 0.73 | 0.18 | 0.26 | 0.65 | 56.57 | -47.25 | 0.83 |
| Dongtan         | 121.96 | 31.52 | 760                    | 0.68 | 0.17 | 0.24 | 1.11 | 34.07 | 12.56  | 0.87 |
| Dunhuang        | 94.68  | 40.15 | 7304                   | 0.60 | 0.13 | 0.24 | 0.75 | 40.88 | -13.92 | 0.81 |
| Ejina           | 101.07 | 41.95 | 6767                   | 0.65 | 0.09 | 0.17 | 0.90 | 33.89 | 1.37   | 0.87 |
| Gucheng         | 115.8  | 39.13 | 2075                   | 0.77 | 0.21 | 0.31 | 0.69 | 44.75 | -37.70 | 0.83 |
| Hami            | 93.52  | 42.82 | 2186                   | 0.61 | 0.10 | 0.17 | 0.85 | 40.55 | -3.92  | 0.87 |
| Hotan           | 79.93  | 37.13 | 1911                   | 0.68 | 0.26 | 0.39 | 0.59 | 55.45 | -50.70 | 0.71 |
| Huimin          | 117.53 | 37.48 | 2427                   | 0.73 | 0.17 | 0.24 | 0.91 | 33.84 | -12.94 | 0.89 |
| Jiuquan         | 98.48  | 39.77 | 1276                   | 0.59 | 0.12 | 0.23 | 0.72 | 38.54 | -23.38 | 0.79 |
| Lhasa           | 91.13  | 29.67 | 2351                   | 0.51 | 0.05 | 0.06 | 0.54 | 71.02 | -64.99 | 0.94 |
| Linan           | 119.73 | 30.3  | 2987                   | 0.71 | 0.17 | 0.24 | 0.81 | 33.54 | -21.12 | 0.87 |
| Minqin          | 103.08 | 38.63 | 3696                   | 0.59 | 0.17 | 0.26 | 0.63 | 48.59 | -35.60 | 0.77 |
| Mt.Gaolan       | 103.85 | 36    | 2278                   | 0.50 | 0.21 | 0.30 | 0.56 | 60.04 | -52.00 | 0.69 |
| Mt.Longfengshan | 127.6  | 44.73 | 4325                   | 0.71 | 0.12 | 0.19 | 0.77 | 43.62 | -26.31 | 0.89 |
| Mt.Tai          | 117.1  | 36.25 | 450                    | 0.61 | 0.32 | 0.41 | 2.18 | 86.93 | 83.22  | 0.63 |



|             |        |       |      |      |      |      |      |       |        |      |
|-------------|--------|-------|------|------|------|------|------|-------|--------|------|
| Nanning     | 108.35 | 22.82 | 1670 | 0.78 | 0.15 | 0.21 | 0.85 | 30.47 | -17.72 | 0.90 |
| Shangdianzi | 117.12 | 40.65 | 6111 | 0.80 | 0.16 | 0.26 | 0.65 | 49.09 | -37.57 | 0.86 |
| Shangrila   | 99.73  | 28.02 | 1518 | 0.58 | 0.04 | 0.05 | 0.84 | 58.53 | -24.62 | 0.96 |
| Tazhong     | 83.67  | 39    | 6006 | 0.62 | 0.22 | 0.34 | 0.69 | 43.58 | -26.18 | 0.76 |
| Tianjin     | 117.17 | 39.1  | 4399 | 0.75 | 0.20 | 0.31 | 0.82 | 36.80 | -22.31 | 0.85 |
| Waliguan    | 100.92 | 36.28 | 1211 | 0.63 | 0.06 | 0.09 | 0.95 | 43.52 | 4.12   | 0.94 |
| Wulate      | 108.52 | 41.57 | 1889 | 0.71 | 0.11 | 0.17 | 0.65 | 54.76 | -46.46 | 0.88 |
| Xi'an       | 108.97 | 34.43 | 1755 | 0.66 | 0.40 | 0.47 | 0.52 | 69.22 | -67.98 | 0.55 |
| Xilinhote   | 116.12 | 43.95 | 6773 | 0.67 | 0.11 | 0.19 | 0.60 | 58.06 | -49.74 | 0.85 |
| Yan'an      | 109.5  | 36.6  | 646  | 0.75 | 0.17 | 0.22 | 0.51 | 69.43 | -67.76 | 0.81 |
| Yinchuan    | 106.22 | 38.48 | 811  | 0.59 | 0.25 | 0.34 | 0.45 | 76.30 | -75.02 | 0.61 |
| Yulin       | 109.2  | 38.43 | 1266 | 0.73 | 0.13 | 0.19 | 0.67 | 47.13 | -38.13 | 0.87 |
| Yushe       | 112.98 | 37.07 | 3283 | 0.74 | 0.22 | 0.32 | 0.58 | 57.22 | -53.04 | 0.77 |
| Zhangbei    | 114.7  | 41.15 | 669  | 0.78 | 0.15 | 0.19 | 0.48 | 77.81 | -76.42 | 0.83 |
| Zhengzhou   | 113.68 | 34.78 | 2675 | 0.73 | 0.26 | 0.36 | 0.71 | 41.40 | -34.40 | 0.78 |
| Zhurihe     | 112.9  | 42.4  | 1135 | 0.78 | 0.09 | 0.14 | 0.74 | 48.28 | -31.55 | 0.92 |
